# Supplementary material for: Ir-catalysed formation of C−F bonds. From allylic alcohols to α-fluoroketones
Source: Royal Society of Chemistry journal article supplement (doi:10.1039/c1cc12653a), 2011-01-01
Supplement: c1cc12653a.pdf [file c1cc12653a.pdf]

## **Electronic Supplementary Information**

### ***Ir-Catalysed Formation of C–F Bonds. From Allylic Alcohols to $\alpha$ -Fluoroketones.***

Nanna Ahlsten and Belén Martín-Matute\*

Department of Organic Chemistry, Arrhenius Laboratory, Stockholm University, SE 106 91  
Stockholm, Sweden

[belen@organ.su.se](mailto:belen@organ.su.se)

## Table of contents for Supporting Information

|     |                                                                                                                                                    |
|-----|----------------------------------------------------------------------------------------------------------------------------------------------------|
| S2  | General                                                                                                                                            |
| S3  | Synthesis of allylic alcohols                                                                                                                      |
| S4  | Characterization data for allylic alcohols <b>1b</b> , <b>1d</b> , <b>1g</b> , <b>1f-d<sub>1</sub></b>                                             |
| S5  | General procedure for the isomerization/fluorination of allylic alcohols <b>1a-1h</b>                                                              |
| S5  | Characterization data of $\alpha$ -fluoroketones <b>2c</b> , <b>2d</b> , <b>2f</b> and <b>2h</b>                                                   |
| S7  | Selected NMR data of $\alpha$ -fluoroketones <b>2a</b> , <b>2b</b> , <b>2e</b> , <b>2g</b> and <b>2f-d<sub>1</sub></b> :                           |
| S9  | <sup>1</sup> H NMR, <sup>13</sup> C NMR spectra of allylic alcohols <b>1b</b> , <b>1d</b> , <b>1g</b> , <b>1f-d<sub>1</sub></b>                    |
| S13 | <sup>1</sup> H NMR, <sup>13</sup> C NMR and <sup>19</sup> F NMR spectra of $\alpha$ -fluoroketones <b>2c</b> , <b>2d</b> , <b>2f</b> and <b>2h</b> |
| S19 | Crude <sup>1</sup> H NMR and <sup>19</sup> F NMR for compounds <b>2a</b> , <b>2b</b> , <b>2e</b> and <b>2g</b>                                     |
| S23 | Control experiment: Fluorination of allylic alcohol <b>1c</b> in the presence of <b>3a</b>                                                         |
| S24 | <sup>1</sup> H NMR, <sup>13</sup> C NMR and <sup>19</sup> F NMR spectra of <b>2f-d<sub>1</sub></b>                                                 |
| S26 | Crossover experiment of <b>1f-d<sub>1</sub></b> and <b>1i</b>                                                                                      |
| S26 | References                                                                                                                                         |

## General

Air and moisture sensitive reactions were carried out under an atmosphere of dry nitrogen. Reagents were used as obtained from commercial suppliers without further purification. THF was used as obtained from supplier (puriss. p. a., stabilized with 2,6-di-tert-butyl-4-methylphenol ~250 mg/l). The undistilled THF used in the reactions tested negative for peroxides (0% by Quantofix peroxide). A potassium dihydrogen phosphate/disodium hydrogen phosphate buffer (pH 7; per litre: 3.54 g KH<sub>2</sub>PO<sub>4</sub>/14.7g Na<sub>2</sub>HPO<sub>4</sub>) was used as obtained from supplier. Flash chromatography was carried out on 60 Å (35-70 µm) silica gel. Spectra were recorded at 400 or 500 MHz for <sup>1</sup>H NMR, at 100 or 125 MHz for <sup>13</sup>C NMR, and at 376 MHz for <sup>19</sup>F NMR on a Bruker Advance spectrometer. <sup>1</sup>H and <sup>13</sup>C NMR chemical shifts ( $\delta$ ) are reported in ppm from tetramethylsilane with the solvent resonance as the internal standard, (CDCl<sub>3</sub>:  $\delta_{\text{H}}$  7.26 and  $\delta_{\text{C}}$  77.16). <sup>19</sup>F NMR chemical shifts ( $\delta$ ) (<sup>1</sup>H-decoupled) are reported in ppm from CFCl<sub>3</sub> with C<sub>6</sub>H<sub>5</sub>F ( $\delta$  -113.15) as internal standard. Coupling constants ( $J$ ) are given in Hz. High resolution mass spectra (HRMS) were recorded on Bruker microTOF ESI-TOF mass spectrometer.

### Preparation of allylic alcohols

Alcohols **1a** and **1e** were used as obtained from supplier. Allylic alcohols **1c**,<sup>1</sup> **1f**,<sup>2</sup> and **1h**<sup>3</sup> were prepared as described in the literature.

Allylic alcohols **1b-d** were prepared in a similar manner to **1h**:<sup>3</sup>

The corresponding aldehyde (1 equiv) was added to a solution of vinylmagnesium bromide (1M in THF, 1.1 equiv) at 0 °C, and then the reaction mixture was slowly warmed to room temperature. On consumption of the aldehyde (as monitored by TLC: EtOAc/Pentane 1:20), the reaction was quenched with NH<sub>4</sub>Cl (aq), extracted with EtOAc (x 3) and washed with brine. The combined organic phases were dried over MgSO<sub>4</sub> and the solvent was removed under reduced pressure. Purification by column chromatography (EtOAc/Pentane 1:20 – 1:5) afforded the pure allylic alcohols.

#### Synthesis of 2-Methylnon-1-en-3-ol (**1g**):

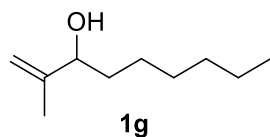

A solution of hexylmagnesium bromide (2M, in diethylether, 20 mmol) was added to a suspension of methacrolein (20 mmol) and CeCl<sub>3</sub> (20 mmol) in dry THF (100 mL) at -78 °C. The reaction was left to slowly warm to room temperature overnight (15 h). The mixture was quenched with NH<sub>4</sub>Cl (aq), extracted with Et<sub>2</sub>O (x 3) and washed with brine. Purification by column chromatography (EtOAc/Pentane 1:30 – 1:10) afforded **1g** as a colourless oil.

#### Synthesis of (*E*)-4-Phenyl-3-buten-2-deuterium-2-ol (**1f-d<sub>1</sub>**):

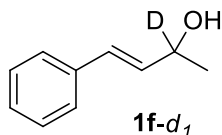

NaBD<sub>4</sub> (172 mg, 4.1 mmol) was added in portions to a solution of benzylideneacetone (585 mg, 4 mmol) and CeCl<sub>3</sub>·7H<sub>2</sub>O (372 mg, 4.5 mmol) in MeOH (25 mL) at 0 °C. The reaction

mixture was stirred at room temperature for 2 h before the addition of HCl (aq, 1M). The methanol was removed under reduced pressure, and the product extracted repeatedly with Et<sub>2</sub>O. The combined organic phases were dried over MgSO<sub>4</sub>, and solvents were evaporated. Purification by column chromatography (Pentane/EtOAc 10:1) afforded **1f-d<sub>1</sub>** as a white solid (540 mg, 92 %, 96 %[D]) (D content determined by <sup>1</sup>H NMR and HRMS-ESI).

### Characterization data of allylic alcohols (1b, 1d, 1g and 1f-d<sub>1</sub>):

#### 4-Ethyloct-1-en-3-ol (1b)

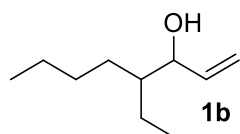

Yellow oil, 73 % isolated yield as a mixture of 2 diastereomers (dr = 1:1): <sup>1</sup>H NMR (CDCl<sub>3</sub>, 400 MHz, mixture of diastereomers): δ 4.87 (ddd, *J*<sub>HH</sub> = 17.0 Hz, *J*<sub>HH</sub> = 10.5 Hz, *J*<sub>HH</sub> = 6.1 Hz, 2H), 5.25-5.20 (m, 2H), 5.16-5.13 (m, 2H), 4.14-4.10 (m, 2H), 1.65-1.16 (m, 16H), 0.92-0.87 (m, 12H); <sup>13</sup>C NMR (CDCl<sub>3</sub>, 125 MHz, mixture of diastereomers): δ 139.9, 139.8, 115.2, 115.1, 74.8, 74.7, 45.1, 45.0, 29.6, 29.5, 23.0 (2C), 22.3, 21.8, 14.1 (2C), 11.7, 11.5.

#### 1-(Benzyloxy)but-3-en-2-ol (1d)

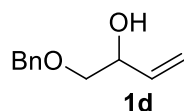

Colourless oil, 76 % isolated yield: <sup>1</sup>H NMR (CDCl<sub>3</sub>, 400 MHz): δ 7.38-7.28 (m, 5H), 5.84 (ddd, *J*<sub>HH</sub> = 17.2 Hz, *J*<sub>HH</sub> = 10.5 Hz, *J*<sub>HH</sub> = 5.5 Hz, 1H), 5.37 (dt, *J*<sub>HH</sub> = 17.2 Hz, *J*<sub>HH</sub> = 1.5 Hz, 1H), 5.20 (dt, *J*<sub>HH</sub> = 10.5 Hz, *J*<sub>HH</sub> = 1.5 Hz, 1H), 4.58 (s, 2H), 4.36 (m, 1H), 3.55 (dd, *J*<sub>HH</sub> = 9.6 Hz, *J*<sub>HH</sub> = 3.4 Hz, 1H), 3.39 (dd, *J*<sub>HH</sub> = 9.6 Hz, *J*<sub>HH</sub> = 7.9 Hz, 1H), 2.51 (br s, 1H); <sup>13</sup>C NMR (CDCl<sub>3</sub>, 125 MHz): δ 137.9, 136.7, 128.6 (2C), 128.0, 127.9 (2C), 116.6, 74.1, 73.5, 71.6; HRMS-ESI: *m/z* 201.0884 ([M+Na]<sup>+</sup>, calcd. for C<sub>11</sub>H<sub>14</sub>O<sub>2</sub>Na<sub>1</sub>: 201.0886)

The NMR data were identical to those previously reported for this compound.<sup>4</sup>

#### 2-Methylnon-1-en-3-ol (1g)

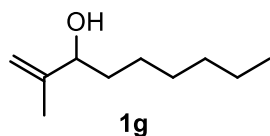

Colourless oil, 53 % isolated yield: <sup>1</sup>H NMR (CDCl<sub>3</sub>, 400 MHz): δ 4.93 (m, 1H), 4.83 (m, 1H), 4.04 (t, *J*<sub>HH</sub> = 6.5 Hz, 1H), 1.72 (m, 3H), 1.58-1.51 (m, 2H), 1.40-1.22 (m, 8H), 0.88 (t,

$J_{HH} = 7.0$  Hz, 3H);  $^{13}\text{C}$  NMR ( $\text{CDCl}_3$ , 125 MHz):  $\delta$  147.8, 111.1, 76.2, 35.1, 31.9, 29.4, 25.7, 22.7, 17.6, 14.2.

The NMR data were identical to those previously reported for this compound.<sup>5</sup>

**(E)-4-Phenyl-3-buten-2-deuterium-2-ol (1f-d<sub>1</sub>):**

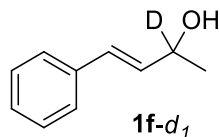

White solid, 92% isolated yield:  $^1\text{H}$  NMR ( $\text{CDCl}_3$ , 400 MHz):  $\delta$  7.40-7.36 (m, 2H), 7.34-7.29 (m, 2H), 7.26-7.22 (m, 1H), 6.56 (d,  $J_{HH} = 15.9$  Hz, 1H), 6.26 (d,  $J_{HH} = 15.9$  Hz, 1H), 1.97 (s, 1H), 1.37 (s, 3H);  $^{13}\text{C}$  NMR ( $\text{CDCl}_3$ , 125 MHz):  $\delta$  136.8, 133.6, 129.4, 128.7 (2C), 127.7, 126.5 (2C), 66.6 (t,  $J_{CD} = 22$  Hz), 23.4; HRMS-ESI:  $m/z$  172.0840 ( $[\text{M}+\text{Na}]^+$ , calcd. for  $\text{C}_{10}\text{H}_{11}\text{D}_1\text{O}_1\text{Na}_1$ : 172.0843).

**General procedure for the isomerization/fluorination of allylic alcohols**

$[\text{IrCp}^*\text{Cl}_2]_2$  (4 mg,  $5 \cdot 10^{-3}$  mmol, 1 mol%) was dissolved in a mixture of THF (2.5 mL) and  $\text{H}_2\text{O}$  (0.5 mL) at 30 °C. Selectfluor® (0.63 mmol, 1.25 eq) and the corresponding allylic alcohol (0.5 mmol) were added to the reaction mixture. The reaction was stirred at 30 °C for the time indicated in Table 3. On completion (as monitored by TLC) water (1 mL) was added and the reaction mixture was extracted with  $\text{Et}_2\text{O}$  (3x2 mL), and dried over  $\text{MgSO}_4$ . Evaporation of the solvent afforded a mixture of  $\alpha$ -fluorinated ketone (**2a-h**) and non-fluorinated ketone (**3a-h**). The yield and F/H ratios were determined by  $^1\text{H}$  NMR using 1,4-dimethoxybenzene (0.25 mmol) as an internal standard. Isolated products were purified by column chromatography ( $\text{EtOAc}$ / $\text{Pentane}$  or  $\text{Et}_2\text{O}$ / $\text{Pentane}$  1:40 – 1:20). TLC plates were developed with  $\text{KMnO}_4$  or Cerium Molybdate (Hanessian's stain).

**Characterization data of isolated  $\alpha$ -fluoroketones 2c, 2d, 2f and 2h:**

**4-Fluoro-1-phenylpentan-3-one (2c)**

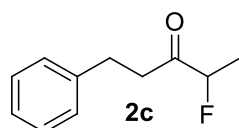

Pale yellow oil, 77% isolated yield:  $^1\text{H}$  NMR ( $\text{CDCl}_3$ , 400 MHz):  $\delta$  7.31-7.26 (m, 2H), 7.22-7.20 (m, 3H), 4.87 (dq,  $J_{HH} = 6.9$  Hz  $J_{HF} = 49.6$  Hz, 1H), 2.99-2.89 (m, 4H), 1.44 (dd,  $J_{HH} = 6.9$  Hz  $J_{HF} = 23.9$  Hz, 3H);  $^{13}\text{C}$  NMR ( $\text{CDCl}_3$ , 125 MHz):  $\delta$  209.4 (d,  $J_{CF} = 24$  Hz), 140.9,

128.7 (2C), 128.5 (2C), 126.4, 92.7 (d,  $J_{CF} = 181$  Hz), 39.2, 28.9 (d,  $J_{CF} = 2$  Hz), 17.6 (d,  $J_{CF} = 22$  Hz);  $^{19}\text{F}$  NMR ( $\text{CDCl}_3$ , 376.4 MHz):  $\delta$  -184.5; HRMS-ESI:  $m/z$  203.0837 ( $[\text{M}+\text{Na}]^+$ , calcd. for  $\text{C}_{11}\text{H}_{13}\text{O}_1\text{F}_1\text{Na}_1$ : 203.0843).

### 1-(Benzyloxy)-3-fluorobutan-2-one (2d)

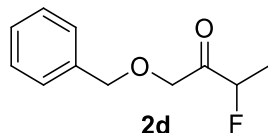

Pale yellow oil, 74 % isolated yield:  $^1\text{H}$  NMR ( $\text{CDCl}_3$ , 400 MHz):  $\delta$  7.37-7.28 (m, 5H), 5.05 (dq,  $J_{HH} = 6.9$  Hz,  $J_{HF} = 48.8$  Hz, 1H), 4.63 (s, 2H), 4.49-3.97 (m, 2H), 1.52 (dd,  $J_{HH} = 6.9$  Hz,  $J_{HF} = 24.3$  Hz, 3H);  $^{13}\text{C}$  NMR ( $\text{CDCl}_3$ , 125 MHz):  $\delta$  206.2 (d,  $J_{CF} = 23$  Hz), 137.1, 128.7 (2C), 128.3, 128.2 (2C), 92.2 (d,  $J_{CF} = 179$  Hz), 73.6, 71.9 (d,  $J_{CF} = 4$  Hz), 17.7 (d,  $J_{CF} = 21$  Hz);  $^{19}\text{F}$  NMR ( $\text{CDCl}_3$ , 376.4 MHz):  $\delta$  191.3; HRMS-ESI:  $m/z$  219.0782 ( $[\text{M}+\text{Na}]^+$ , calcd. for  $\text{C}_{11}\text{H}_{13}\text{O}_2\text{F}_1\text{Na}_1$ : 219.0792).

### 3-Fluoro-4-phenylbutan-2-one (2f)

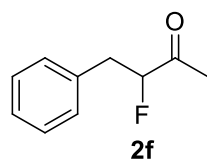

Pale yellow oil, 67 % isolated yield:  $^1\text{H}$  NMR ( $\text{CDCl}_3$ , 400 MHz):  $\delta$  7.34-7.22 (m, 5H), 4.94 (ddd,  $J_{HH} = 3.8$  Hz,  $J_{HH} = 7.5$  Hz,  $J_{HF} = 49.9$  Hz, 1H), 3.19 (ddd,  $J_{HH} = 3.8$  Hz,  $J_{HH} = 14.7$  Hz,  $J_{HF} = 28.9$  Hz, 1H), 3.05 (ddd,  $J_{HH} = 7.5$  Hz,  $J_{HH} = 14.7$  Hz,  $J_{HF} = 26.2$  Hz, 1H), 2.14 (d,  $J_{HF} = 4.9$  Hz, 3H);  $^{13}\text{C}$  NMR ( $\text{CDCl}_3$ , 125 MHz):  $\delta$  208.1 (d,  $J_{CF} = 26$  Hz), 135.4, 129.6 (2C), 128.7 (2C), 127.2 (2C), 96.0 (d,  $J_{CF} = 185$  Hz), 38.2 (d,  $J_{CF} = 21$  Hz), 26.5;  $^{19}\text{F}$  NMR ( $\text{CDCl}_3$ , 376.4 MHz):  $\delta$  188.2; HRMS-ESI:  $m/z$  189.0694 ( $[\text{M}+\text{Na}]^+$ , calcd. for  $\text{C}_{10}\text{H}_{11}\text{O}_1\text{F}_1\text{Na}_1$ : 189.0686).

The NMR data were identical to those previously reported for this compound.<sup>6</sup>

### 2-Fluoro-1-phenylpropan-1-one (2h)

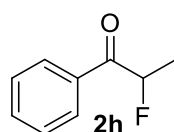

Colourless oil, 68 % (contaminated with ~4 % propiophenone):  $^1\text{H}$  NMR ( $\text{CDCl}_3$ , 400 MHz):  $\delta$  8.01-7.99 (m, 2H), 7.65-7.61 (m, 1H), 7.53-7.49 (m, 2H), 5.73 (dq,  $J_{\text{HH}} = 6.8$  Hz,  $J_{\text{HF}} = 48.6$  Hz, 1H), 1.69 (dd,  $J_{\text{HH}} = 6.8$  Hz,  $J_{\text{HF}} = 24$  Hz, 3H);  $^{13}\text{C}$  NMR ( $\text{CDCl}_3$ , 125 MHz):  $\delta$  197.1 (d,  $J_{\text{CF}} = 19.3$  Hz), 134.2, 133.9, 129.1 ( $J_{\text{CF}} = 3.7$  Hz, 2C), 128.9 (2C), 90.4 (d,  $J_{\text{CF}} = 180$  Hz), 18.4 (d,  $J_{\text{CF}} = 23$  Hz);  $^{19}\text{F}$  NMR ( $\text{CDCl}_3$ , 376.4 MHz):  $\delta$  -181.4; HRMS-ESI:  $m/z$  175.0537 ( $[\text{M}+\text{Na}]^+$ , calcd. for  $\text{C}_9\text{H}_9\text{O}_1\text{F}_1\text{Na}_1$ : 175.0530)

The  $^1\text{H}$  NMR data were identical to those previously reported for this compound.<sup>7</sup>

Litt  $^{19}\text{F}$  NMR: -180.6,7 -181.9 to -182.3<sup>8</sup> and -183.5<sup>9</sup>

### **Selected NMR data of $\alpha$ -fluoroketones 2a, 2b, 2g and 2f-d<sup>1</sup>:**

$\alpha$ -Fluoroketones **2c-d**, **2f** and **2h** were not isolated due to difficulty of separation, volatility and difficulty of detection by TLC. Yields were calculated using 1,4-dimethoxybenzene or fluorobenzene as internal standard and are shown in Table 3. Selected  $^1\text{H}$  and  $^{19}\text{F}$  NMR peaks are presented here:

#### **2-Fluorooctan-3-one (2a)**

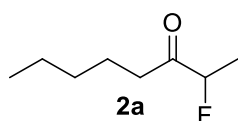

$^1\text{H}$  NMR ( $\text{CDCl}_3$ , 400 MHz):  $\delta$  4.85 (dq,  $J_{\text{HH}} = 6.9$  Hz,  $J_{\text{HF}} = 49.6$  Hz, 1H), 2.59 (dt,  $J_{\text{HH}} = 3.7$  Hz,  $J_{\text{HF}} = 2.9$  Hz, 2H), 1.63-1.53 (m, 2H), 1.46 (dd,  $J_{\text{HF}} = 24$  Hz,  $J_{\text{HH}} = 6.9$  Hz, 3H), 1.37-1.20 (m, 4H), 0.89 (t,  $J_{\text{HH}} = 6.8$  Hz, 3H);  $^{13}\text{C}$  NMR ( $\text{CDCl}_3$ , 125 MHz):  $\delta$  210.7 (d,  $J_{\text{CF}} = 24$  Hz), 92.7 (d,  $J_{\text{CF}} = 181$  Hz), 37.5, 31.5, 22.54, 22.53, 17.8 (d,  $J_{\text{CF}} = 23$  Hz), 14.0;  $^{19}\text{F}$  NMR ( $\text{CDCl}_3$ , 376.4 MHz):  $\delta$  -184.2

#### **4-Ethyl-2-fluorooctan-3-one (2b)**

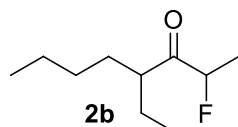

Mixture of 2 diastereomers (dr = 1:1):  $^1\text{H}$  NMR ( $\text{CDCl}_3$ , 400 MHz, two diastereomers):  $\delta$  4.88 (dq,  $J_{\text{HH}} = 6.9$  Hz  $J_{\text{HF}} = 49.5$  Hz, 1H), 4.87 (dq,  $J_{\text{HH}} = 6.9$  Hz  $J_{\text{HF}} = 49.5$  Hz, 1H), 2.93-2.87 (m, 2H), 1.72-1.53 (m, 4H), 1.55-1.34 (m, 4H), 1.46 (dd,  $J_{\text{HH}} = 6.9$  Hz  $J_{\text{HF}} = 23.8$  Hz, 6H), 1.33-1.14 (m, 8H), 0.89-0.81 (m, 12H);  $^{13}\text{C}$  NMR ( $\text{CDCl}_3$ , 125 MHz, two diastereomers):  $\delta$  213.70 (d,  $J_{\text{CF}} = 22$  Hz), 213.67 (d,  $J_{\text{CF}} = 23$  Hz) 92.58 (d,  $J_{\text{CF}} = 182$  Hz), 92.56 (d,  $J_{\text{CF}} = 182$

Hz), 48.0, 47.9, 30.6, 30.2, 29.8, 29.7, 24.3, 23.9, 22.9 (2C), 17.6 (d,  $J_{CF} = 22$  Hz), 17.5 (d,  $J_{CF} = 22$  Hz), 14.0 (2C), 12.0, 11.8;  $^{19}\text{F}$  NMR ( $\text{CDCl}_3$ , 376.4 MHz, 2 diastereomers):  $\delta$  -184.56, -158.57

### 3-fluoropentan-2-one (2e)

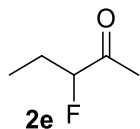

$^1\text{H}$  NMR ( $\text{CDCl}_3$ , 400 MHz):  $\delta$  4.67 (ddd,  $J_{HH} = 4.5$  Hz,  $J_{HH} = 7.5$  Hz,  $J_{HF} = 50.2$  Hz, 1H), 2.25 (d,  $J_{HF} = 4.8$  Hz, 3H), 1.93-1.74 (m, 2H), 1.01 (t,  $J_{HH} = 7.5$  Hz, 3H);  $^{13}\text{C}$  NMR ( $\text{CDCl}_3$ , 125 MHz):  $\delta$  208.5 (d,  $J_{CF} = 26$  Hz), 97.0 (d,  $J_{CF} = 184$  Hz), 26.2, 25.3 (d,  $J_{CF} = 21$  Hz), 8.9 (d,  $J_{CF} = 4.3$  Hz);  $^{19}\text{F}$  NMR ( $\text{CDCl}_3$ , 376.4 MHz):  $\delta$  -191.1

### 2-Fluoro-2-methylnonan-3-one (2g)

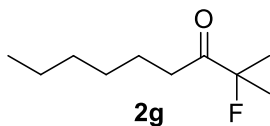

$^1\text{H}$  NMR ( $\text{CDCl}_3$ , 400 MHz):  $\delta$  2.64 (dt,  $J_{HH} = 7.4$  Hz,  $J_{HF} = 3.2$  Hz, 2H), 1.64-1.18 (m, 8H), 1.43 (d,  $J_{HF} = 23$  Hz, 6H), 0.92-0.82 (m, 3H);  $^{13}\text{C}$  NMR ( $\text{CDCl}_3$ , 125 MHz):  $\delta$  212.8 (d,  $J_{CF} = 28$  Hz), 99.1 (d,  $J_{CF} = 179$  Hz), 36.6, 31.7, 29.0, 24.3 (d,  $J_{CF} = 24$  Hz, 2C), 23.0 (d,  $J_{CF} = 2$  Hz), 22.6, 14.2;  $^{19}\text{F}$  NMR ( $\text{CDCl}_3$ , 376.4 MHz):  $\delta$  -149.0

### 3-Fluoro-4-deuterium-4-phenylbutan-2-one (2f-d<sub>1</sub>)

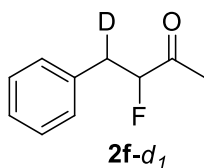

Mixture of 2 diastereomers. Deuterium content was 95% as determined by  $^1\text{H}$  NMR and  $^{19}\text{F}$  NMR.  $^1\text{H}$  NMR ( $\text{CDCl}_3$ , 400 MHz, two diastereomers):  $\delta$  7.34-7.22 (m, 10H), 5.01-4.85 (m, 2H), 3.25-2.98 (m, 2H), 2.138 (d,  $J_{HF} = 4.9$  Hz, 3H), 2.136 (d,  $J_{HF} = 4.9$  Hz, 3H);  $^{13}\text{C}$  NMR ( $\text{CDCl}_3$ , 125 MHz):  $\delta$  208.1 (d,  $J_{CF} = 26$  Hz), 135.4, 129.6 (2C), 128.7 (2C), 127.3, 90.0 (d,  $J_{CF} = 187$  Hz), 37.9 (dt,  $J_{CF} = 20$  Hz,  $J_{CD} = 20$  Hz), 26.5;  $^{19}\text{F}$  NMR ( $\text{CDCl}_3$ , 376.4 MHz, two diastereomers):  $\delta$ : -188.44 (t,  $J_{DF} = 4.4$  Hz), -188, 47 (t,  $J_{DF} = 4.0$  Hz). Minor peak (5%) from non deuterated **2f** at -188.2; HRMS-ESI:  $m/z$  190.0749 ( $[\text{M}+\text{Na}]^+$ , calcd. for  $\text{C}_{10}\text{H}_{10}\text{D}_1\text{O}_1\text{F}_1\text{Na}_1$ : 190.0749)



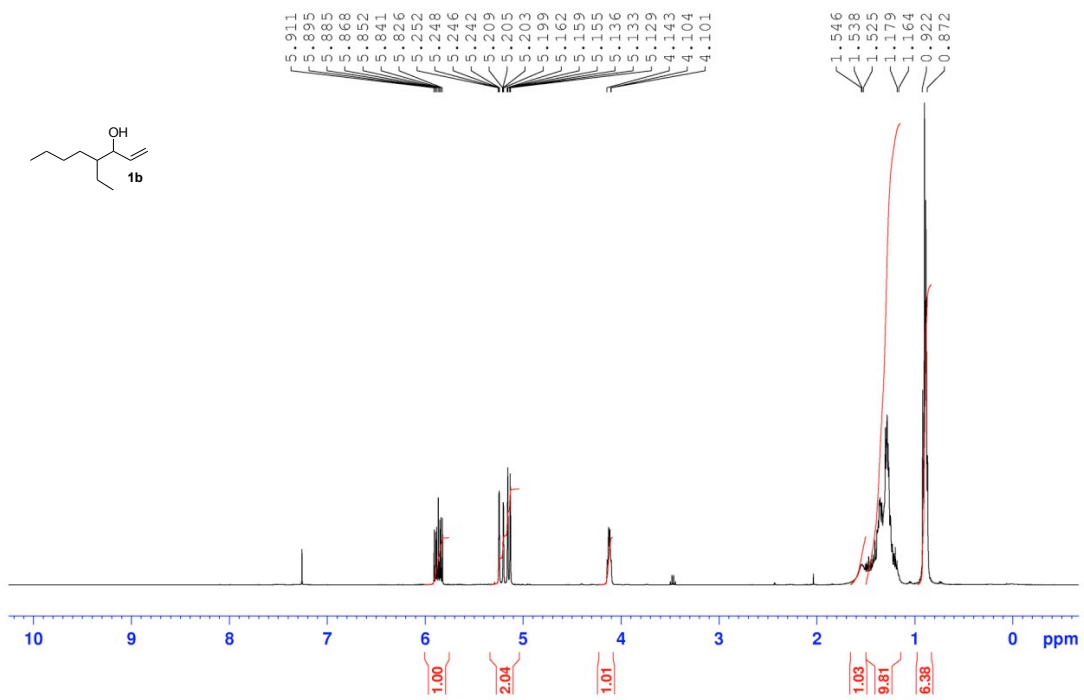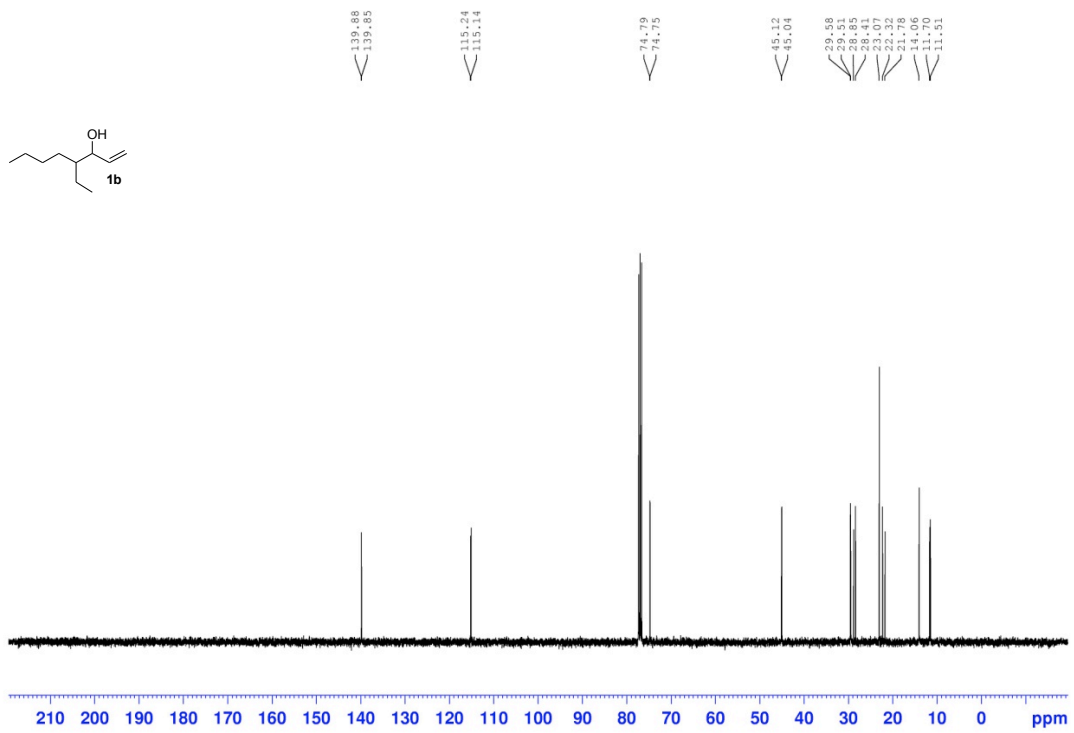

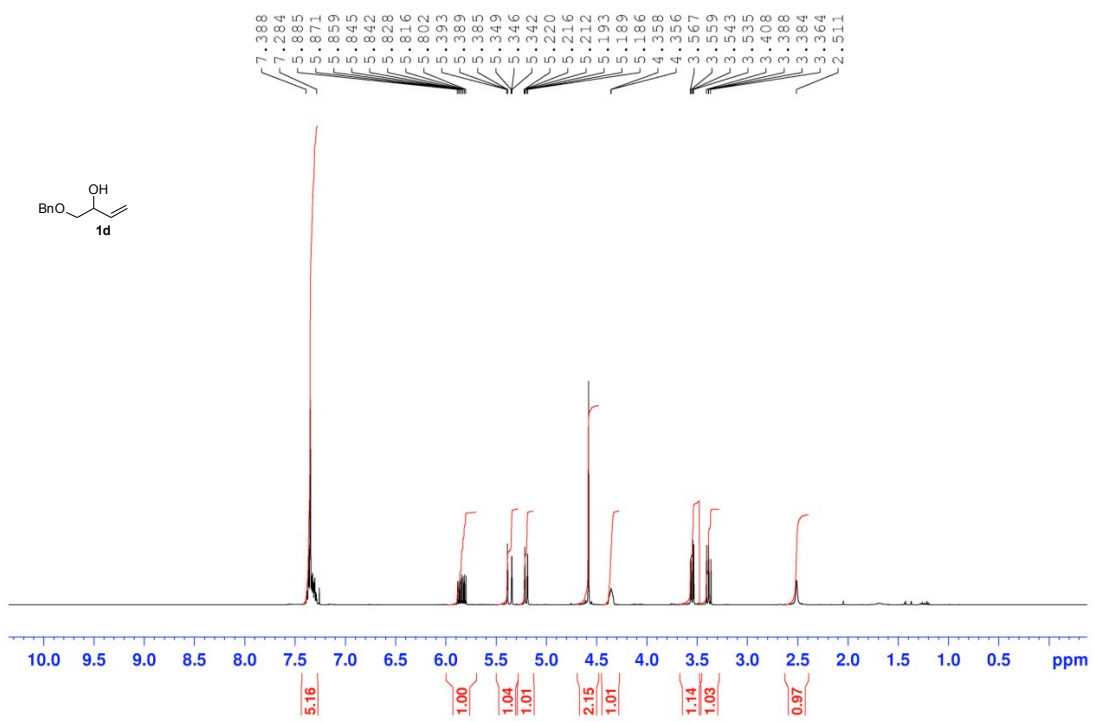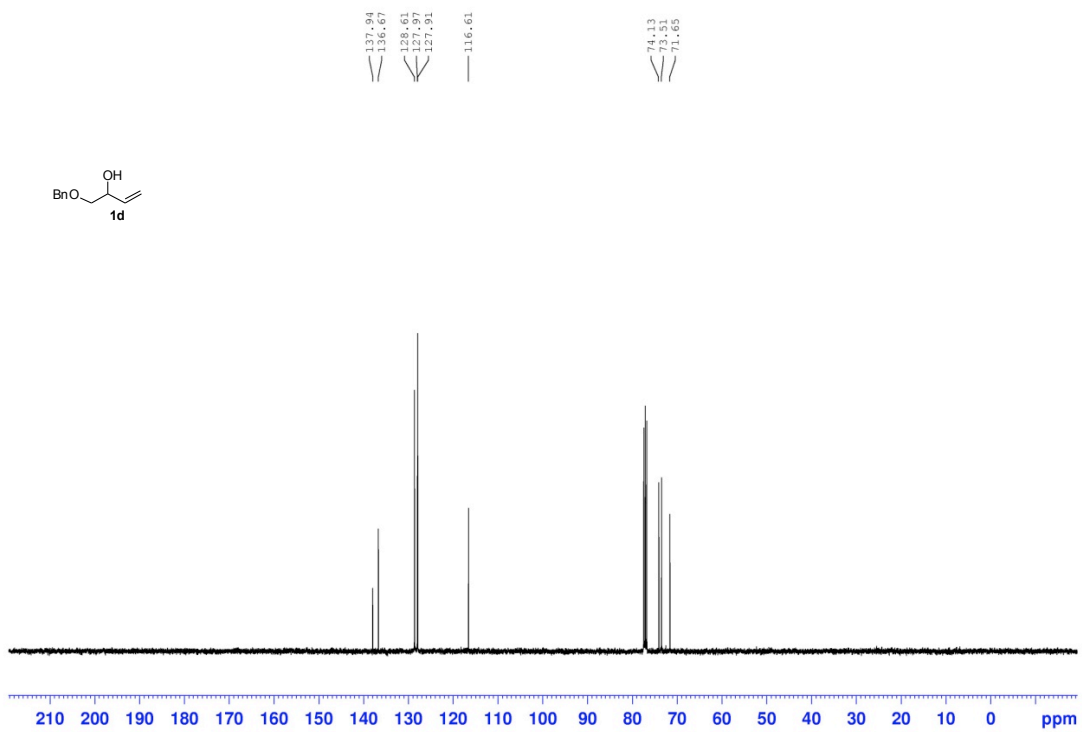

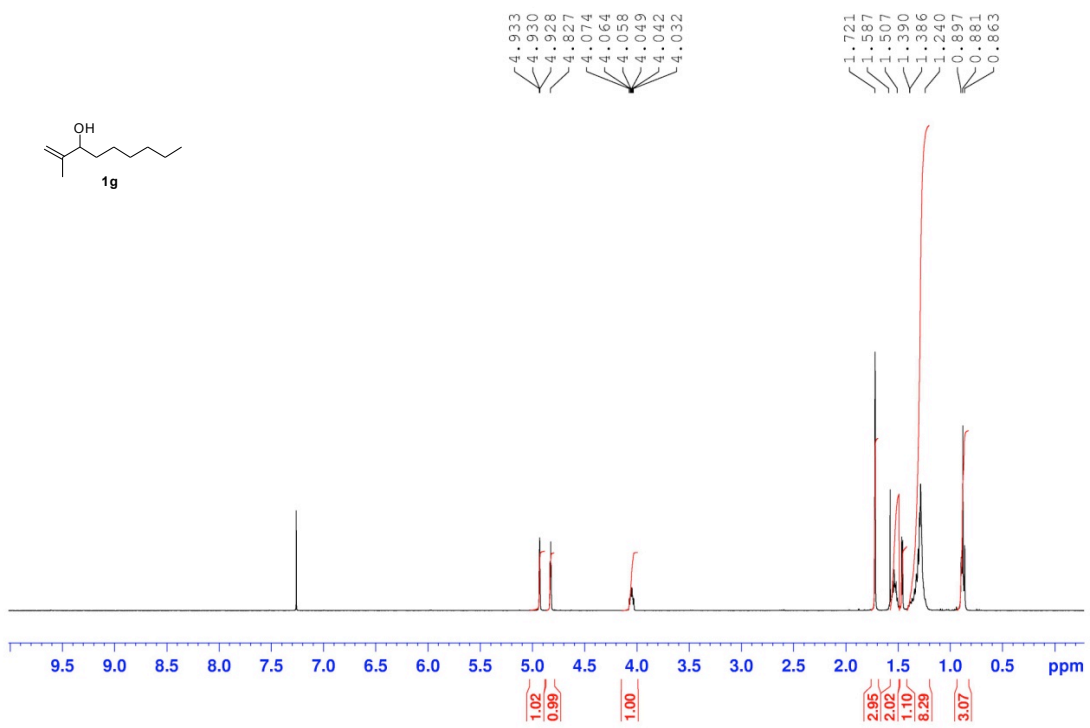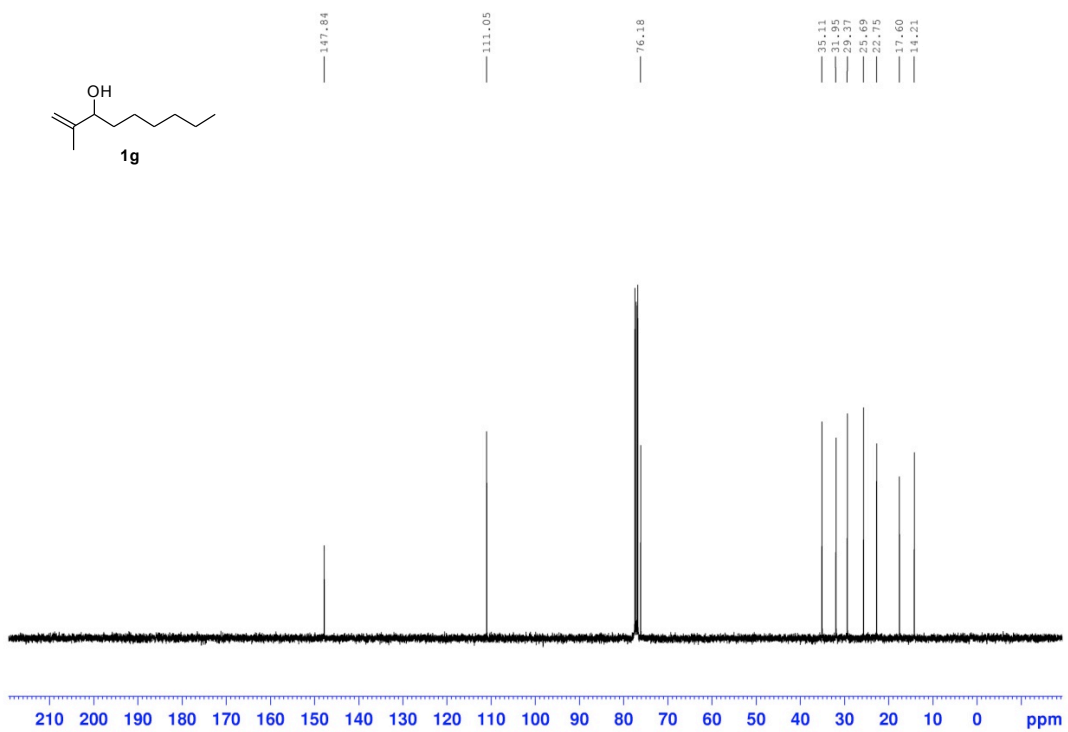

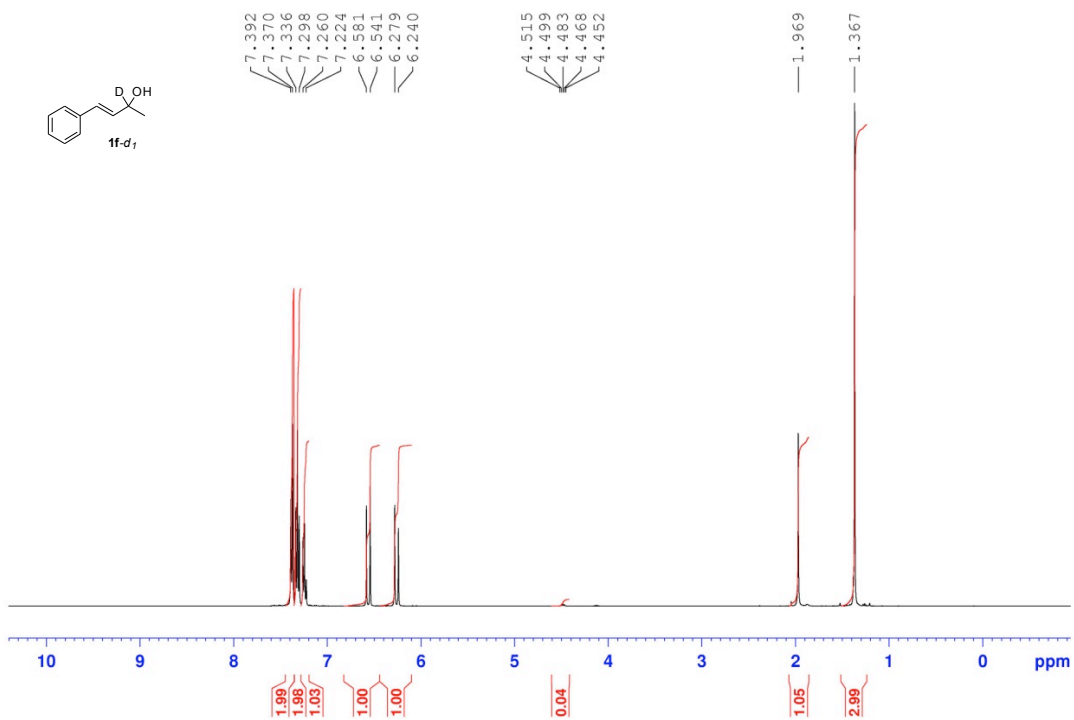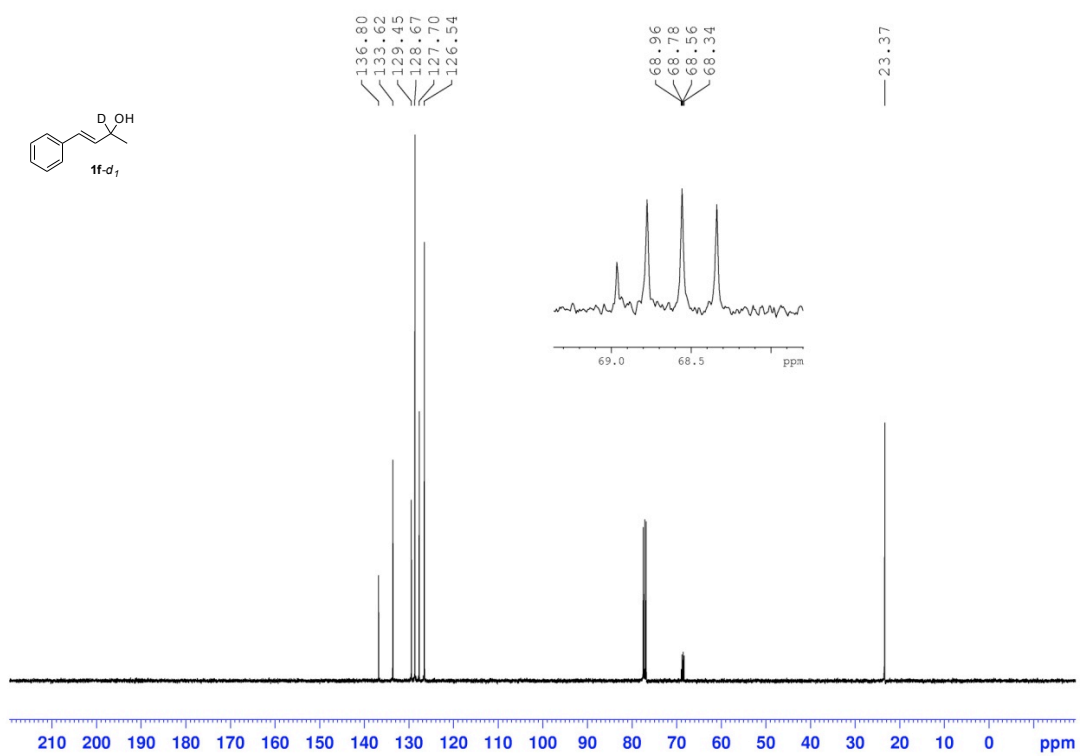

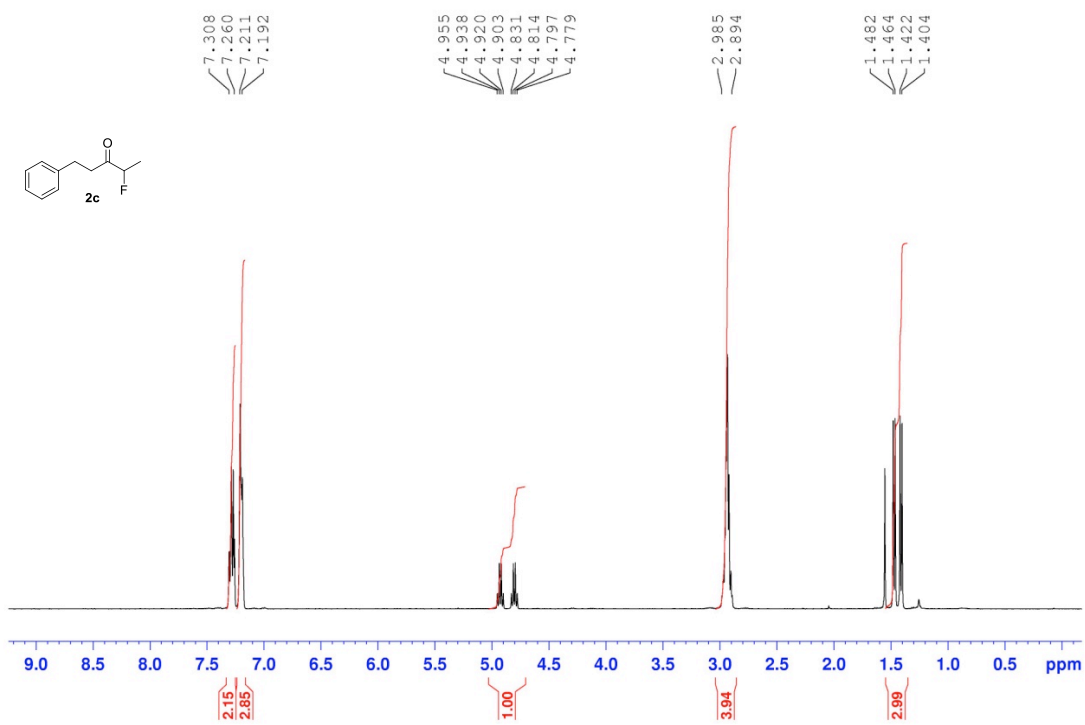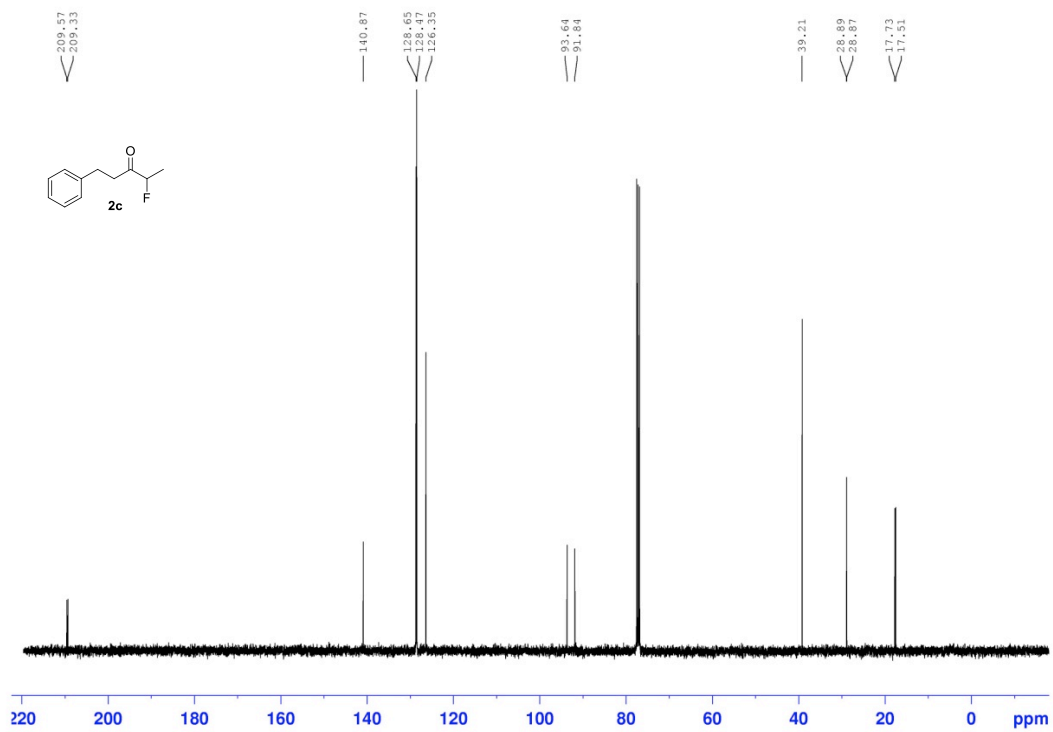

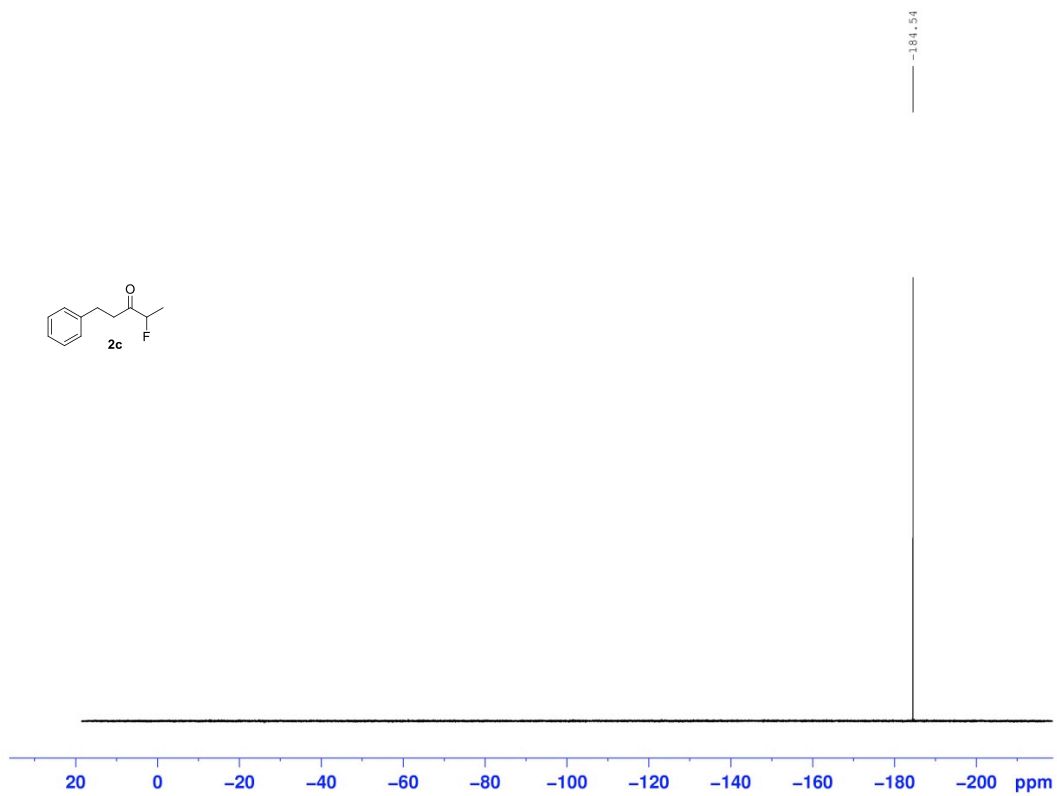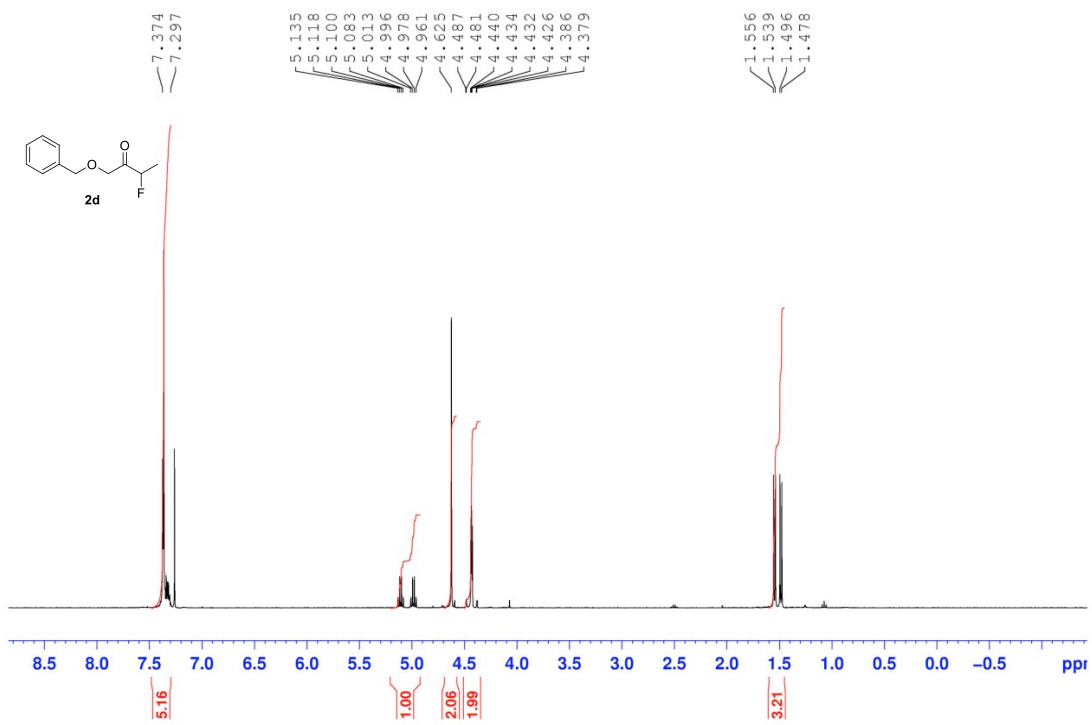

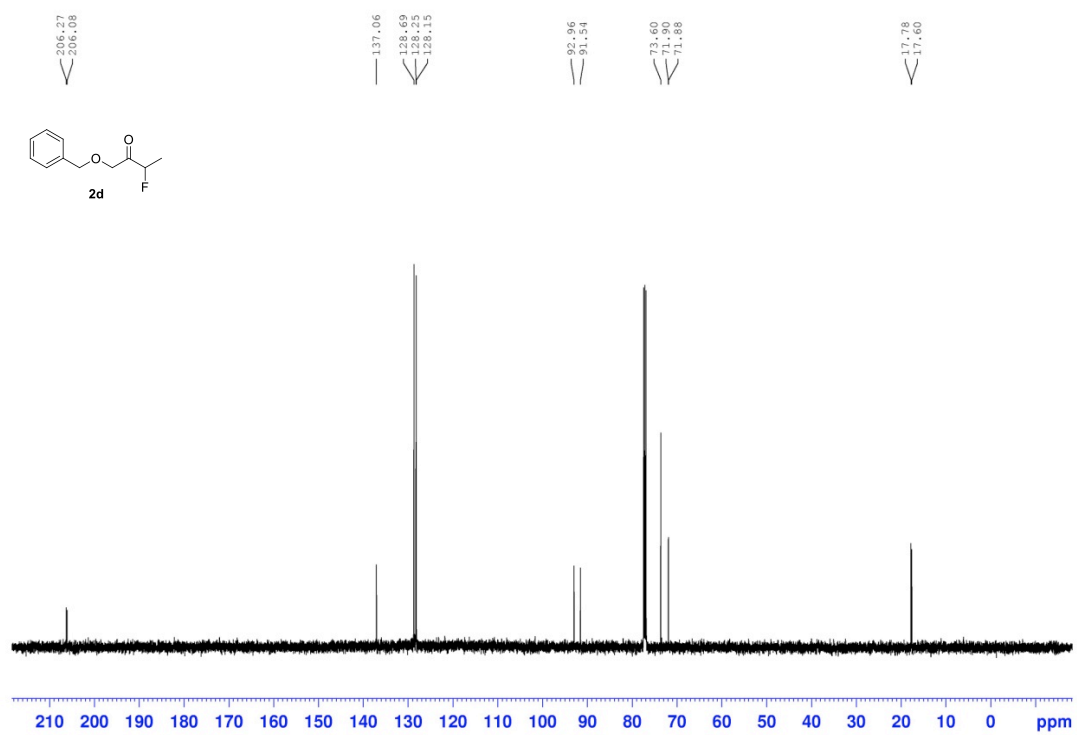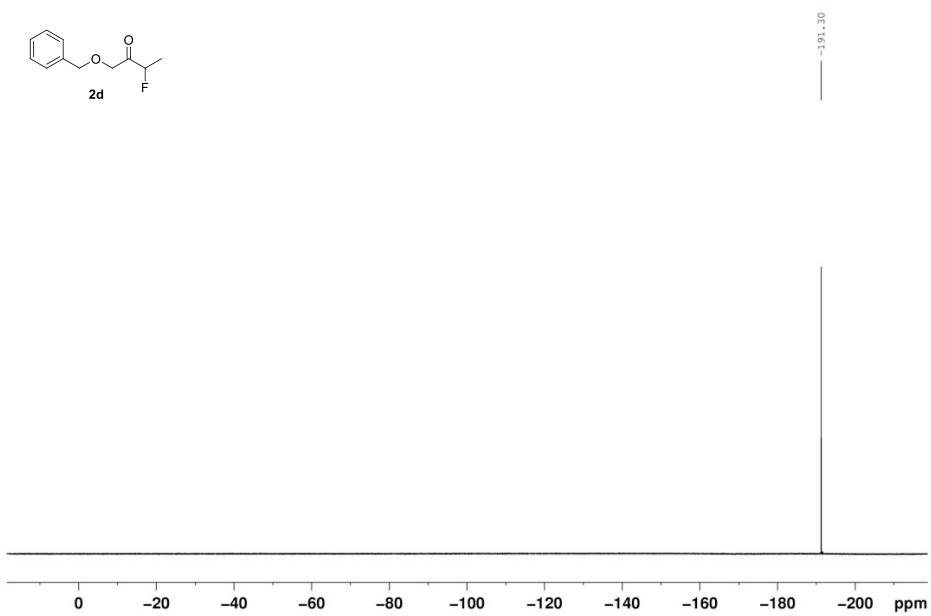

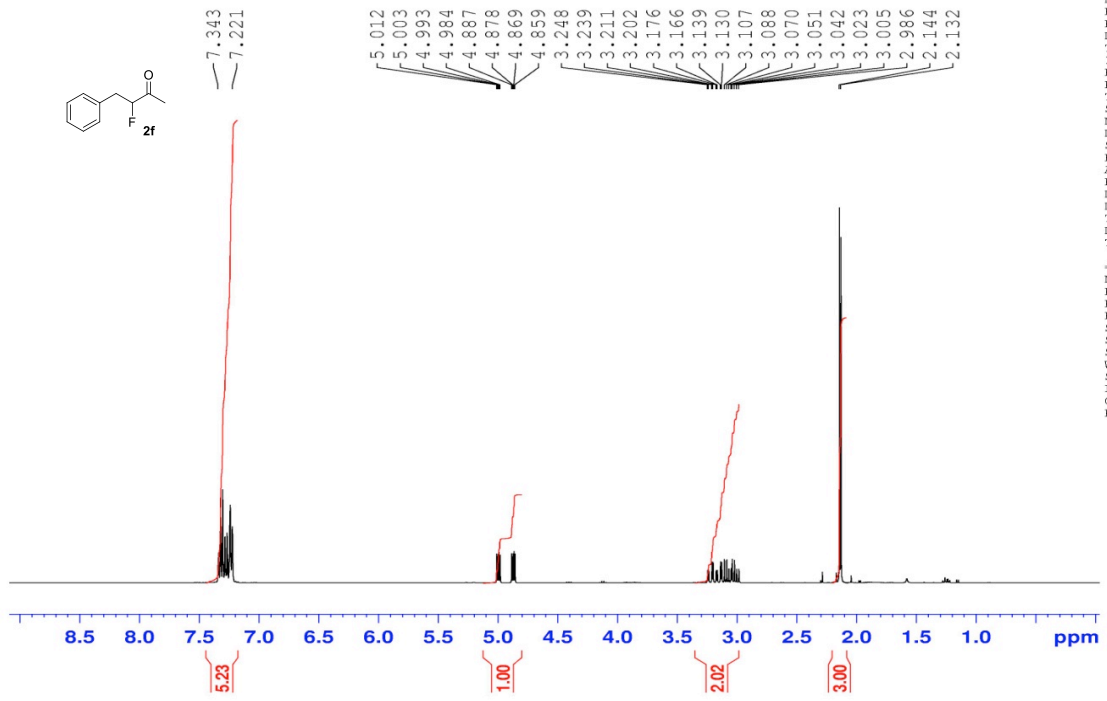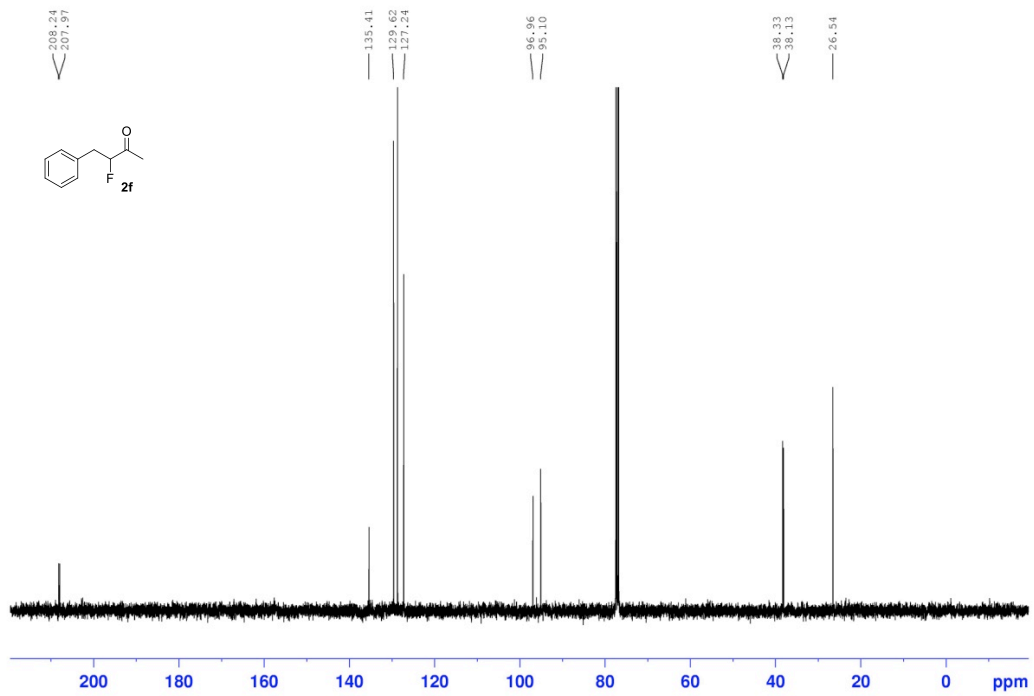



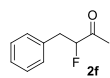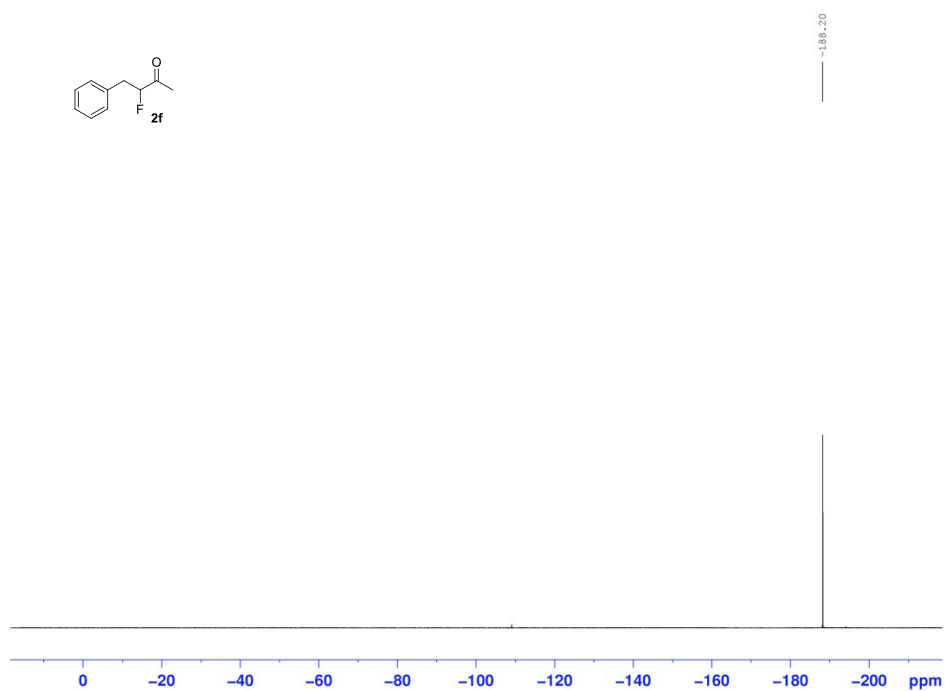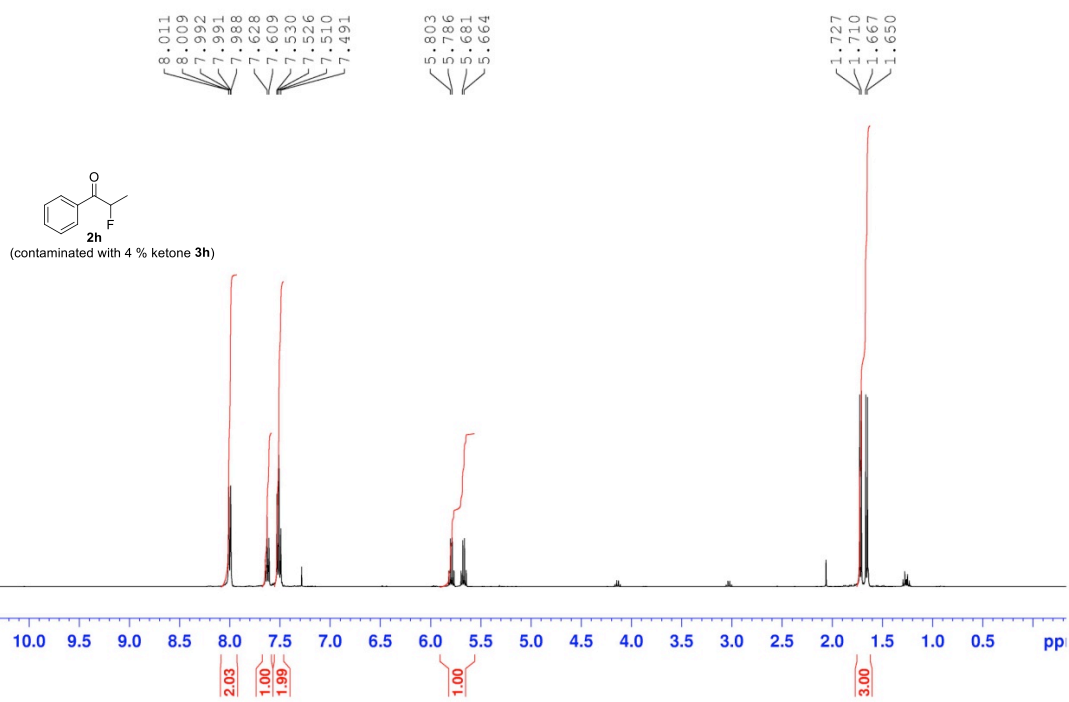

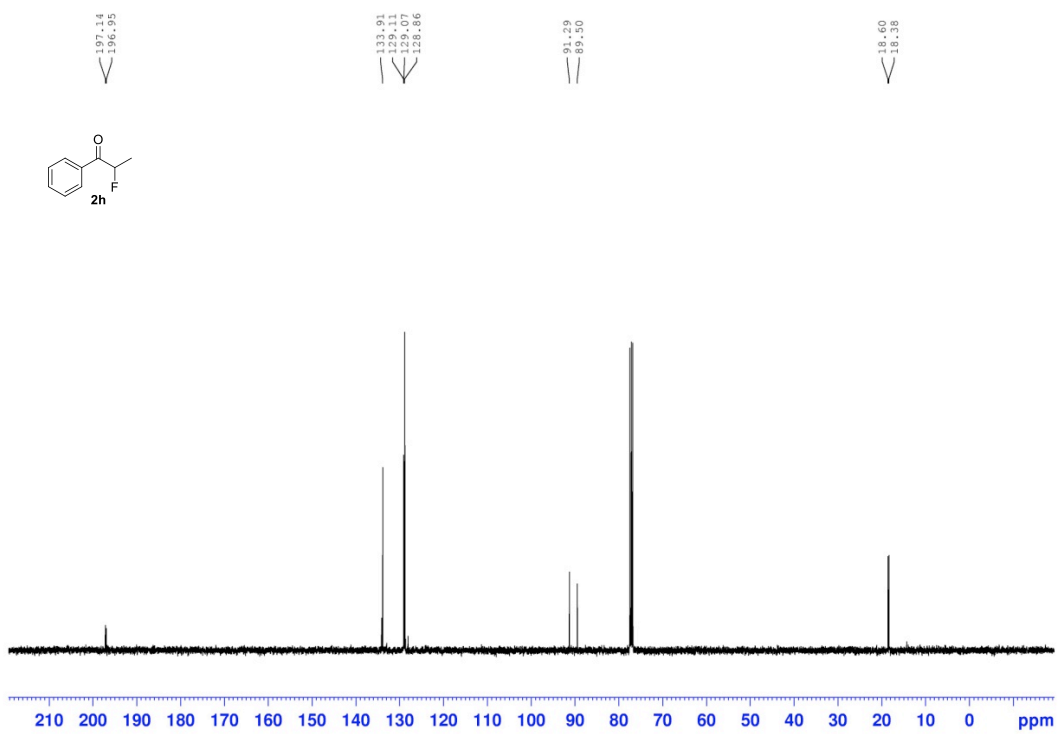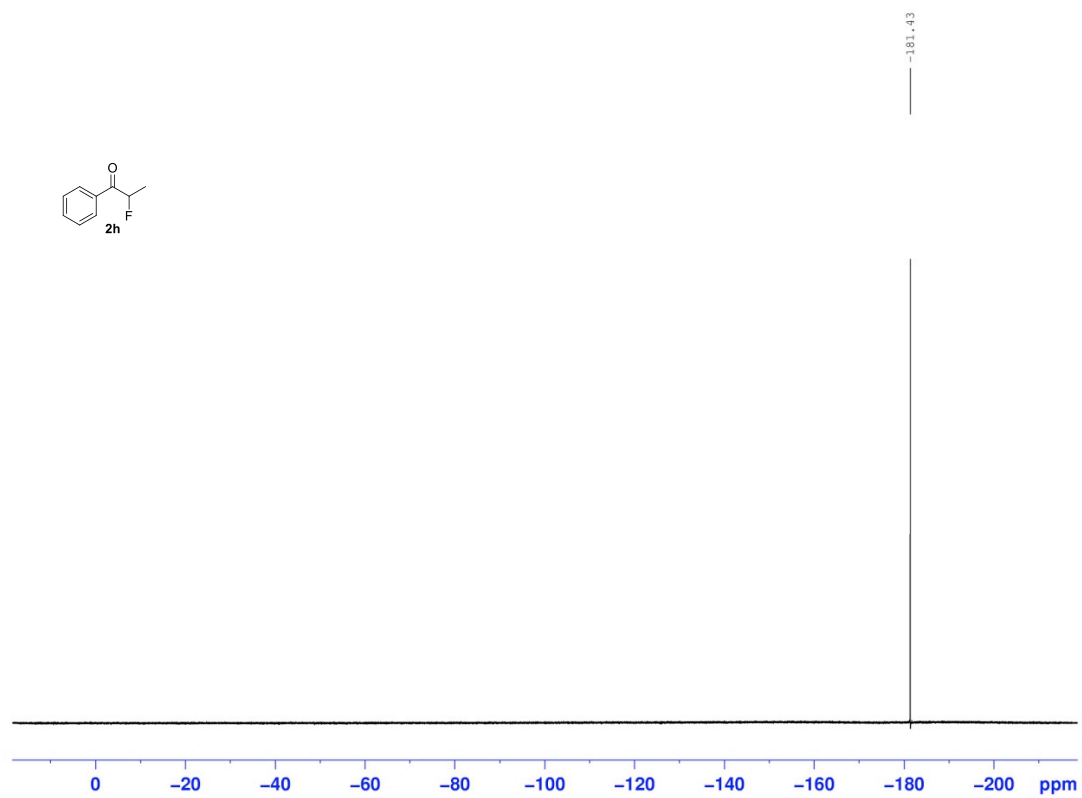

Crude NMR of **2a**:

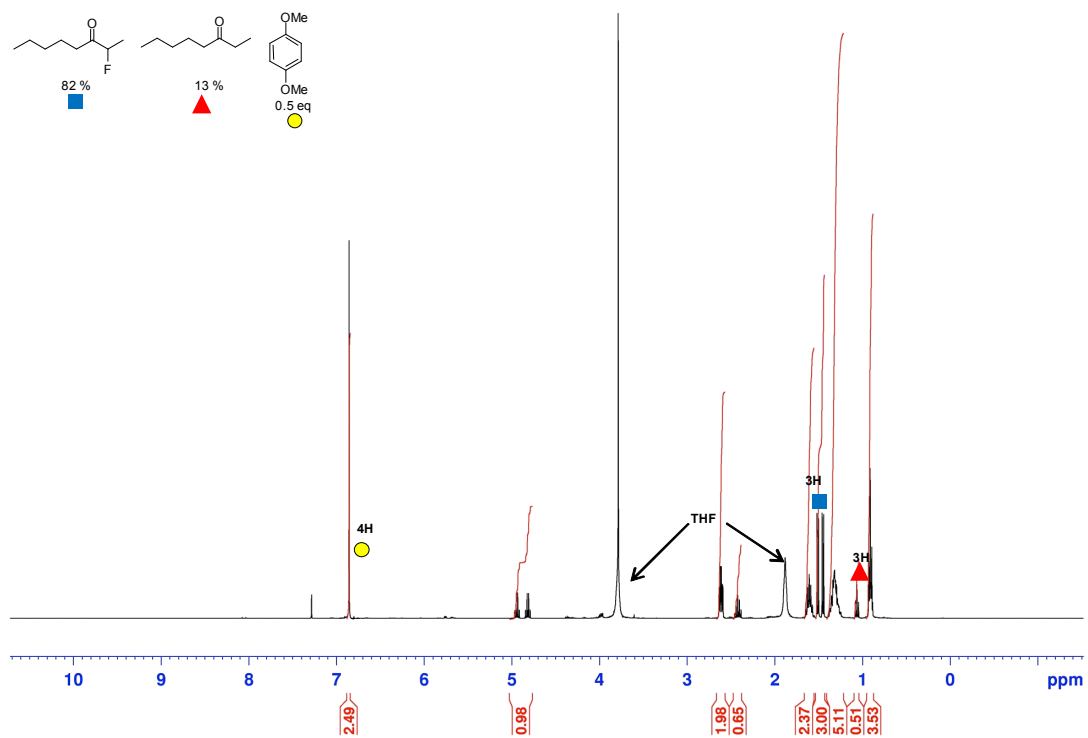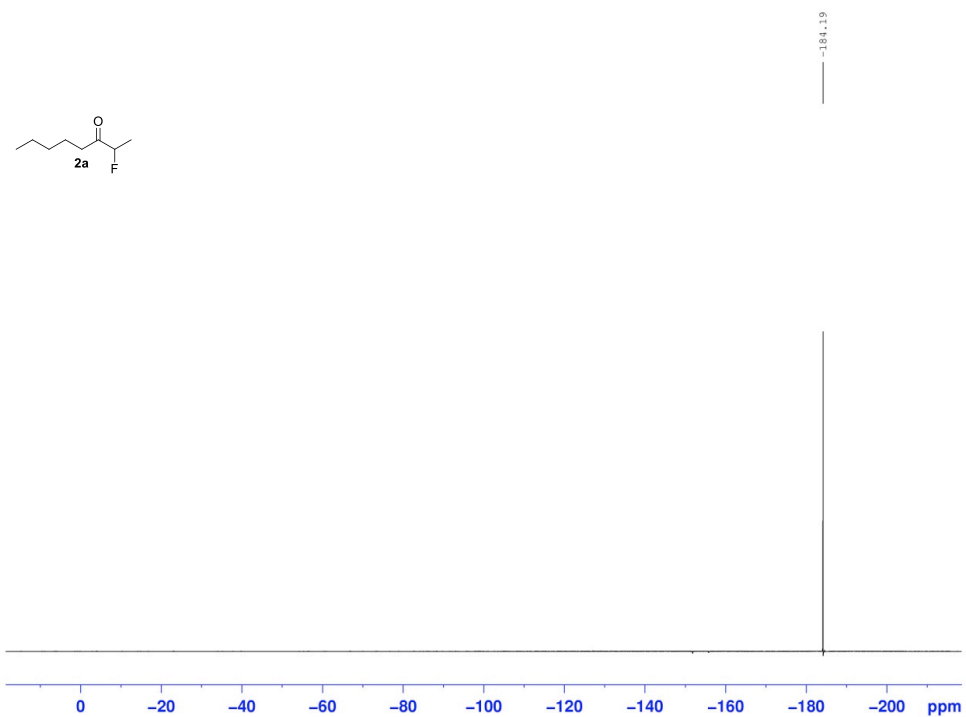

Crude NMR of **2b**

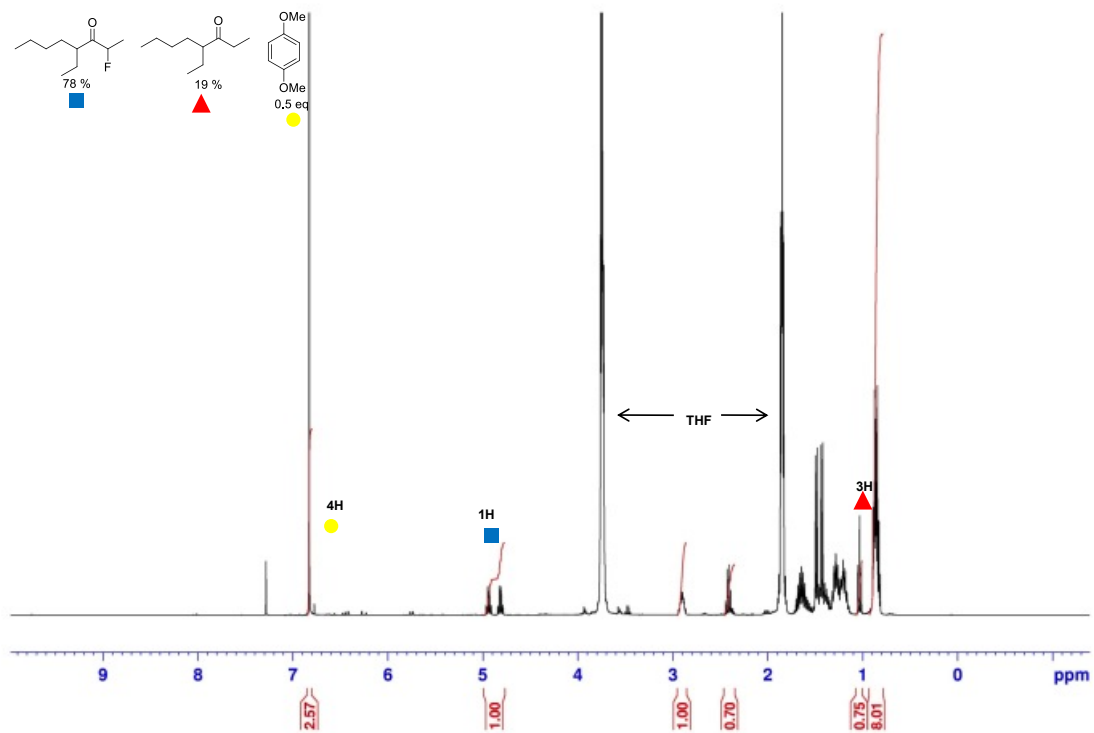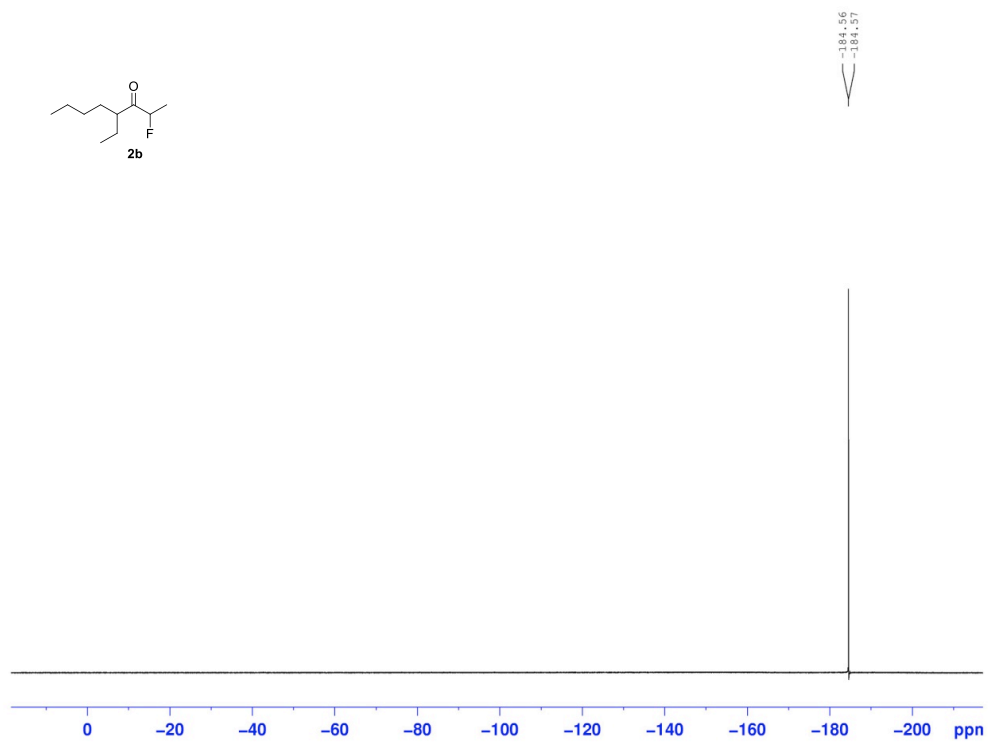

# Crude NMR of 2g

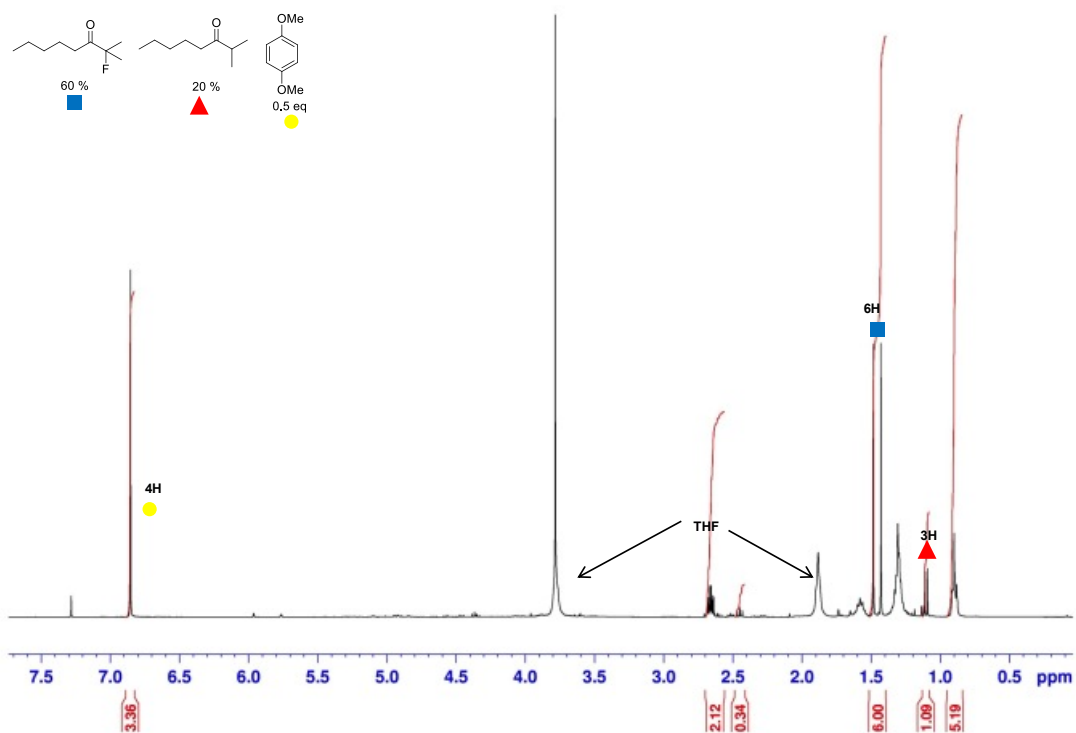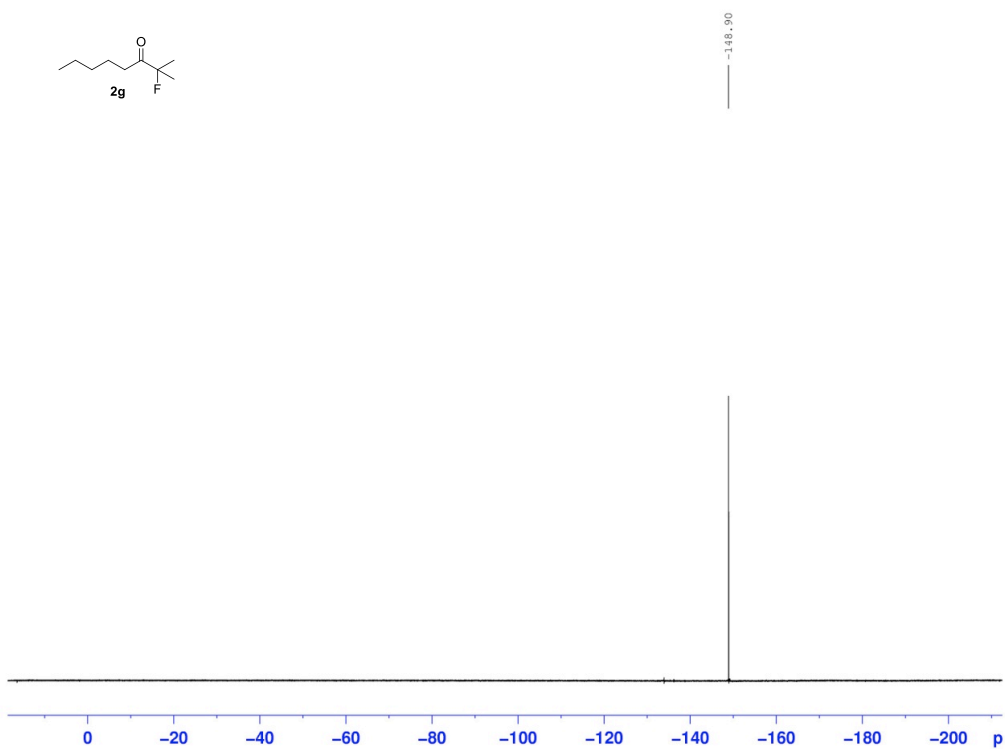

Crude NMR of **2e** in THF-*d*<sub>8</sub>

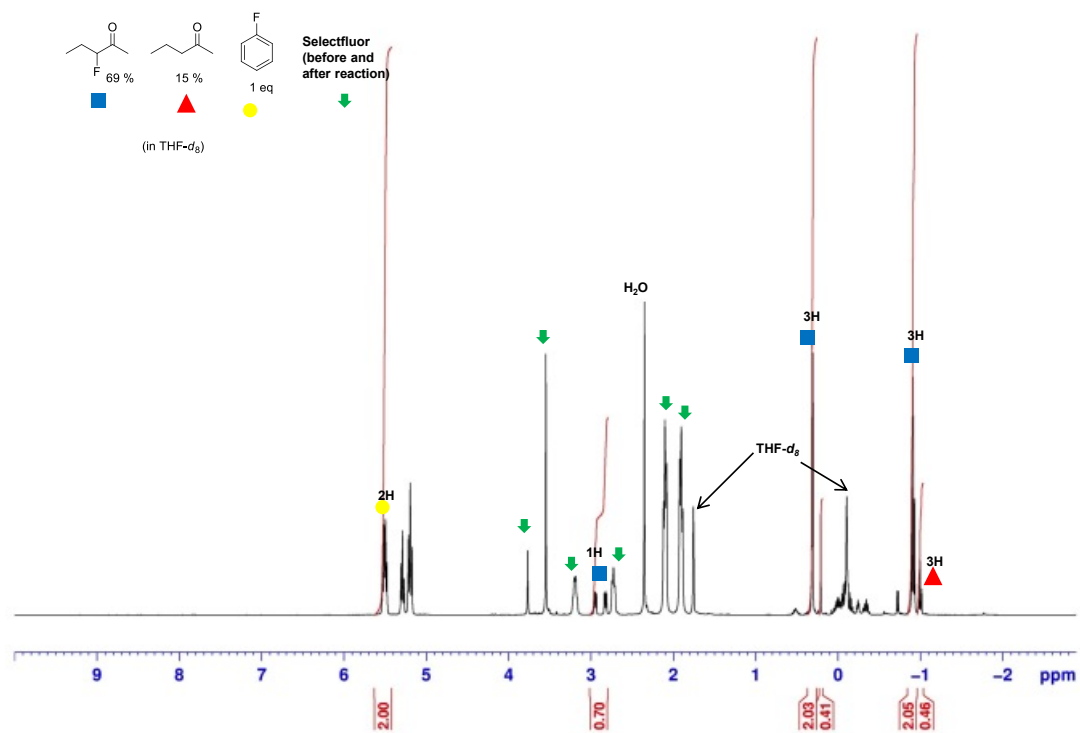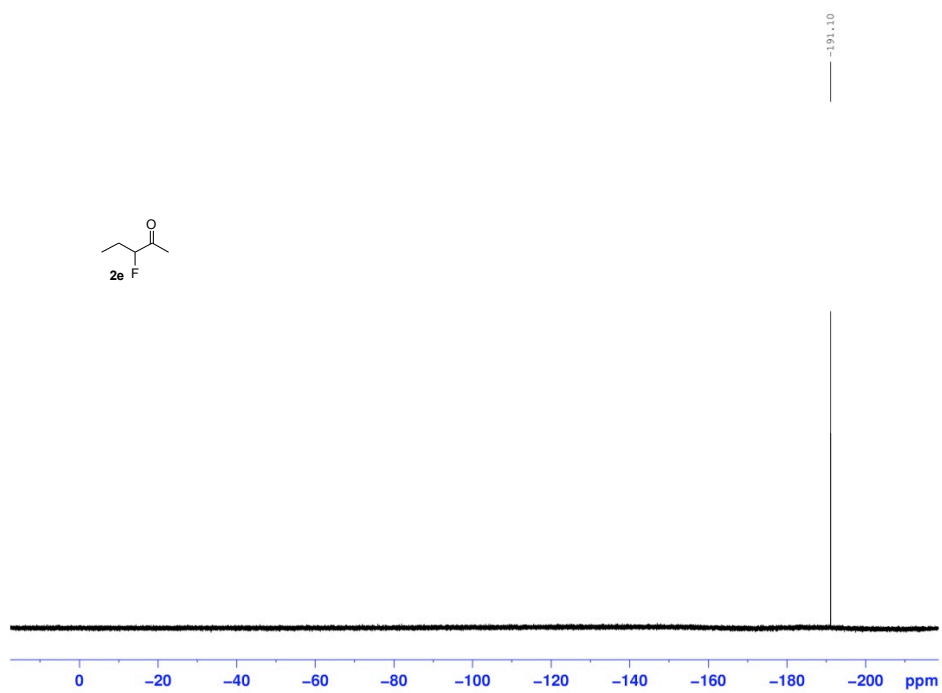

**Control experiment:** fluorination of allylic alcohol **1c** (1 equiv) in the presence of ketone **3a**

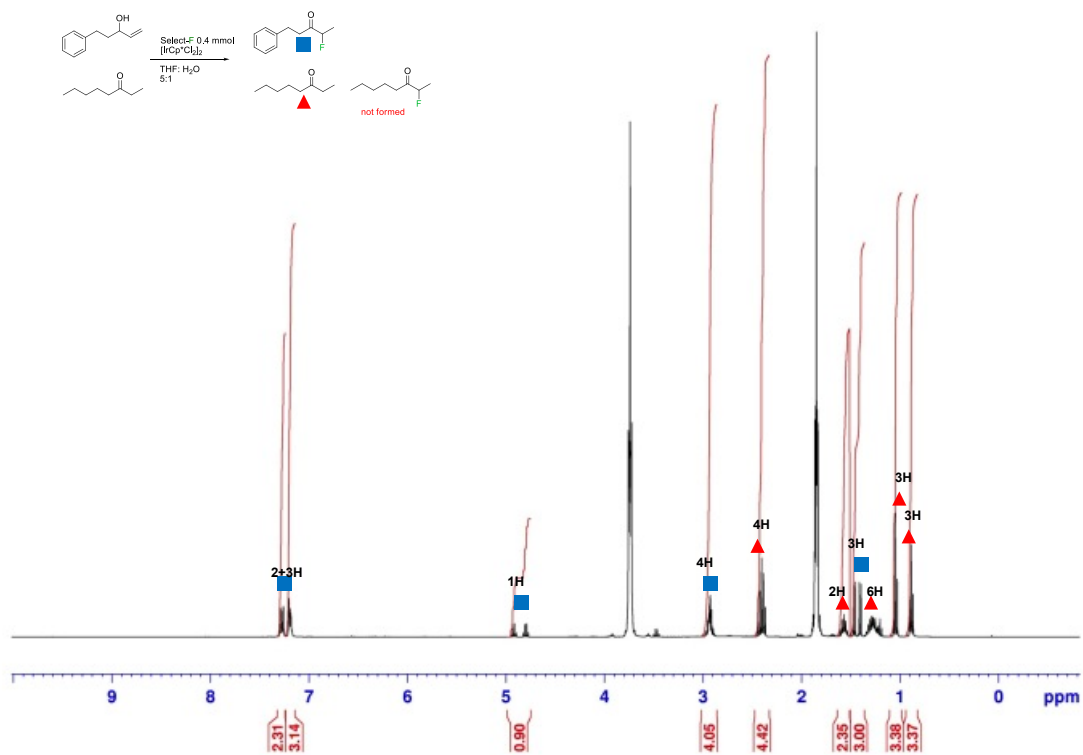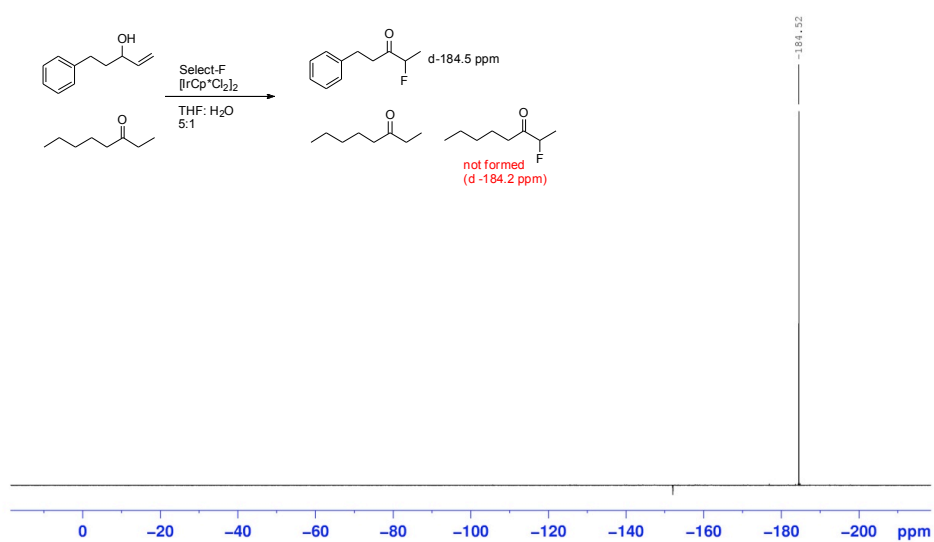

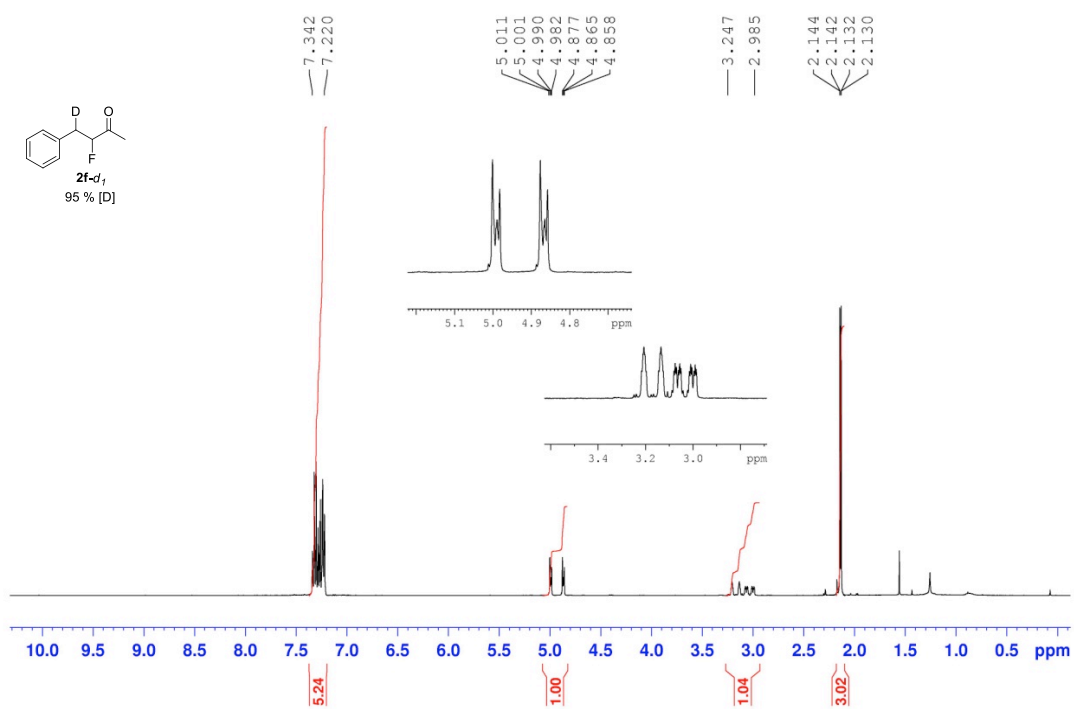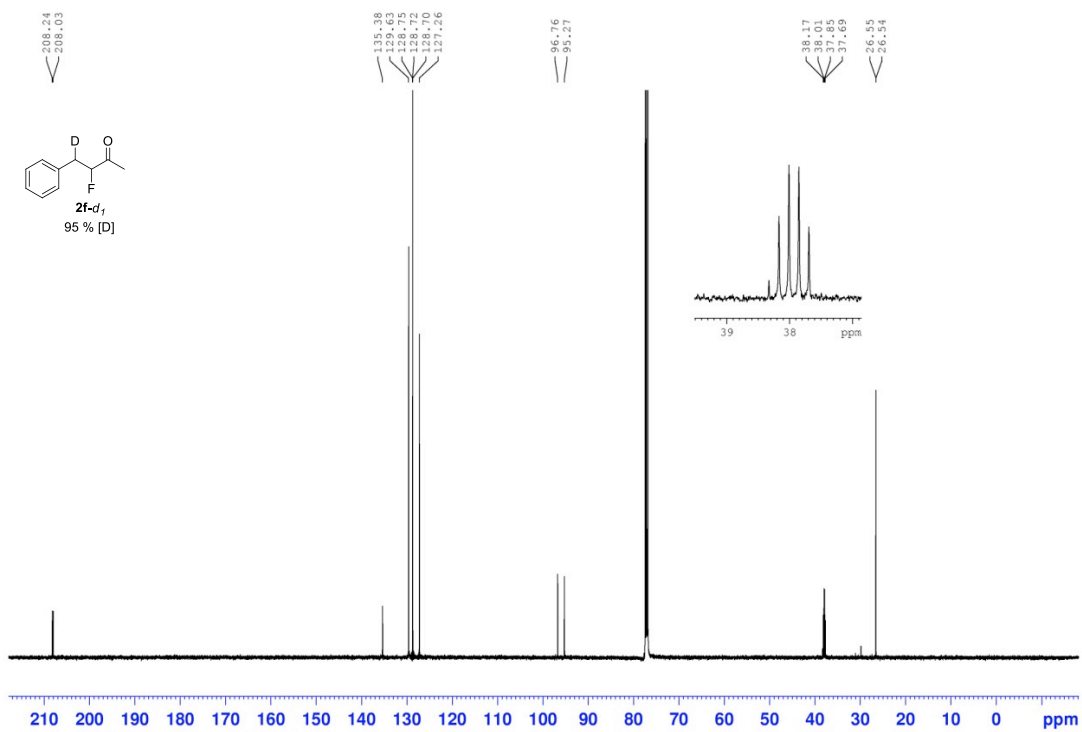



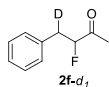

95 % [D] (Two diastereomers, two 1:1:1 triplets @ 188.42 and 188.47)  
5 % non-deuterated **2f** (singlet at @188.2)

188.20  
188.42  
188.47  
188.45  
188.46  
188.48

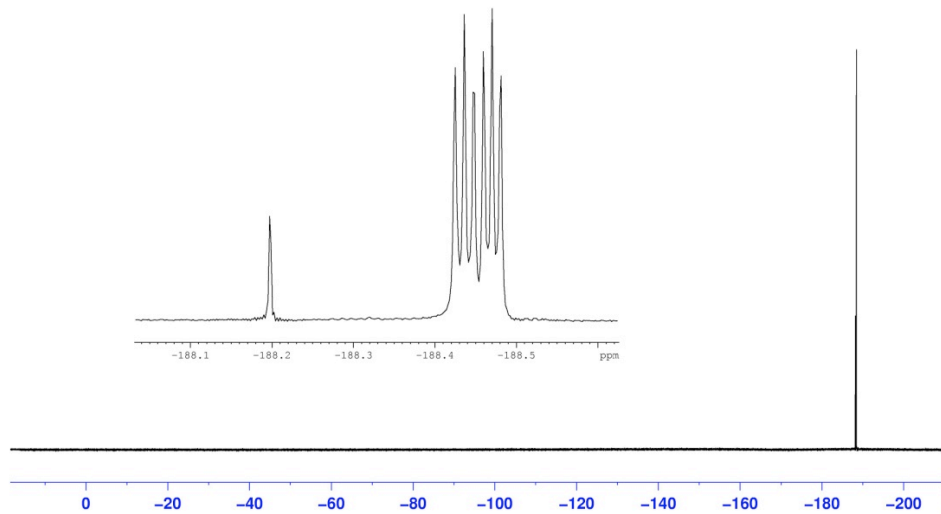

### Crossover experiment of **1f-d<sub>1</sub>** and **1i**:

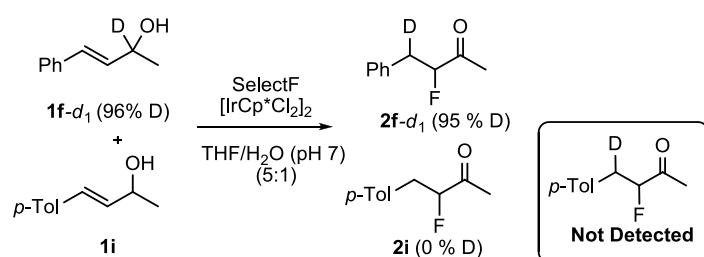

Analysis of the reaction mixture by <sup>1</sup>H, <sup>19</sup>F and <sup>13</sup>C NMR showed **2f-d<sub>1</sub>** and **2i** as only products. However, due to the difficulty of detecting minor amounts of deuterated **2i** by NMR (overlapping signals), the ketones were reduced to the corresponding alcohols (**4f**, **4i**) with NaBH<sub>4</sub> in THF/H<sub>2</sub>O, and analysed by HRMS-ESI (unreduced **2i** and **2f-d<sub>1</sub>** did not give sufficient intensities accurate detection of small amounts of deuterium).

The height of m/z peaks were corrected for the natural <sup>13</sup>C content .

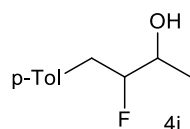

HRMS-ESI: m/z 205.1009 ([M+Na]<sup>+</sup>, calcd. for C<sub>11</sub>H<sub>15</sub>F<sub>1</sub>O<sub>1</sub>Na<sub>1</sub>: 205.0999) 100 %

HRMS-ESI: m/z calcd. for C<sub>11</sub>D<sub>1</sub>H<sub>14</sub>F<sub>1</sub>O<sub>1</sub>Na<sub>1</sub>: 206.1062 0 %

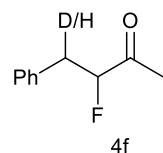

HRMS-ESI: m/z 192.0913 ([M+Na]<sup>+</sup>, calcd. for C<sub>10</sub>H<sub>12</sub>D<sub>1</sub>F<sub>1</sub>O<sub>1</sub>Na<sub>1</sub>: 192.0905) 95 %

HRMS-ESI: m/z 191.0851 ([M+Na]<sup>+</sup>, calcd. for C<sub>10</sub>H<sub>13</sub>F<sub>1</sub>O<sub>1</sub>Na<sub>1</sub>: 191.0843) 5 %

<sup>1</sup> Kim, J. W.; Koike, T.; Kotani, M.; Yamaguchi, K.; Mizuno, N. *Chemistry – A European Journal* **2008**, *14*, 4104-4109.

<sup>2</sup> M. B. Onaran, C. T. Seto, *J. Org. Chem.* **2003**, *68*, 8136.

<sup>3</sup> L. J. Gazzard, W. B. Motherwell, D. A. Sandham, *J. Chem. Soc., Perkin Trans. 1* **1999**, 979.

<sup>4</sup> Ghosh, A. K.; Leshchenko, S.; Noetzel, M. *The Journal of Organic Chemistry* **2004**, *69*, 7822-7829.

<sup>5</sup> Fernández-Mateos, A.; Herrero Teijón, P.; Mateos Burón, L.; Rabanado Clemente, R.; Rubio González, R. *The Journal of Organic Chemistry* **2007**, *72*, 9973-9982.

<sup>6</sup> Stavber, G.; Zupan, M.; Stavber, S. *Synlett* **2009**, 2009, 589-594.

<sup>7</sup> Cousseau, J.; Albert, P. *J. Org. Chem.* **1989**, *54*, 5380

<sup>8</sup> Sato, S.; Yoshida, M.; Hara, S. *Synthesis* **2005**, 2005, 2602-2605

<sup>9</sup> Stavber, S.; Zupan, M. *J. Org. Chem.* **1987**, *52*, 5022-5025
